# Supplementary material
Source: PubMed Central journal article supplement (PMC8532036)
Supplement: jamaophthalmol-e214103-s001.pdf [file jamaophthalmol-e214103-s001.pdf]

## Supplemental Online Content

Maguire MG, Liu D, Bressler SB, et al; the DRCR Retina Network. Lapses in care among patients assigned to ranibizumab for proliferative diabetic retinopathy: a post hoc analysis of a randomized clinical trial. *JAMA Ophthalmol*. Published online October 21, 2021. doi:10.1001/jamaophthalmol.2021.4103

**eTable 1.** Baseline factors of participants and study eye alive through 5 years with eyes assigned to ranibizumab

**eTable 2.** Multivariable analysis of baseline factors associated with a long lapse in care

**eTable 3.** Duration of follow-up at time of dropout and visual acuity at baseline and the last completed visit

This supplemental material has been provided by the authors to give readers additional information about their work.

**eTable 1. Baseline factors of participants/study eye alive through 5 years with eyes assigned to ranibizumab**

| <b>Baseline Factors</b>                                                                   | <b>Participants Treated with Ranibizumab</b> |
|-------------------------------------------------------------------------------------------|----------------------------------------------|
| <b>No. of Participants</b>                                                                | 170                                          |
| <b>Participant Factors</b>                                                                |                                              |
| <b>Sex, N (%)</b>                                                                         |                                              |
| Female                                                                                    | 76 (44.7%)                                   |
| Male                                                                                      | 94 (55.3%)                                   |
| <b>Age (yrs.)</b>                                                                         |                                              |
| Median (Q1, Q3)                                                                           | 51 (44, 59)                                  |
| Mean $\pm$ SD                                                                             | 51 $\pm$ 12                                  |
| <b>No. of study eyes enrolled, N (%)</b>                                                  |                                              |
| 1                                                                                         | 89 (52.4%)                                   |
| 2                                                                                         | 81 (47.6%)                                   |
| <b>Race/ethnicity, N (%)</b>                                                              |                                              |
| White                                                                                     | 88 (51.8%)                                   |
| Hispanic                                                                                  | 42 (24.7%)                                   |
| Black/African American                                                                    | 35 (20.6%)                                   |
| Other                                                                                     | 5 (2.9%)                                     |
| <b>Diabetes type, N (%)</b>                                                               |                                              |
| Type 1                                                                                    | 40 (23.5%)                                   |
| Type 2                                                                                    | 124 (72.9%)                                  |
| Uncertain                                                                                 | 6 (3.5%)                                     |
| <b>Duration of diabetes (yrs.)</b>                                                        |                                              |
| Median (Q1, Q3)                                                                           | 18 (12, 25)                                  |
| Mean $\pm$ SD                                                                             | 19 $\pm$ 11                                  |
| <b>Hemoglobin A1c (%)<sup>a</sup></b>                                                     |                                              |
| Median (Q1, Q3)                                                                           | 8.6 (7.5, 10.3)                              |
| Mean $\pm$ SD                                                                             | 8.9 $\pm$ 2.2                                |
| <b>Functional Comorbidity Index</b>                                                       |                                              |
| Median (Q1, Q3)                                                                           | 0 (0, 1)                                     |
| Mean $\pm$ SD                                                                             | 0.8 $\pm$ 1.1                                |
| <b>Fellow eye visual acuity (letter score)<sup>b</sup></b>                                |                                              |
| Median (Q1, Q3)                                                                           | 76 (64, 83)                                  |
| Snellen equivalent, Median (Q1, Q3)                                                       | 20/32<br>(20/50, 20/25)                      |
| <b>Study-Eye Factors</b>                                                                  |                                              |
| <b>Visual acuity (letter score)<sup>b</sup></b>                                           |                                              |
| Median (Q1, Q3)                                                                           | 78 (72, 84)                                  |
| Snellen equivalent, Median (Q1, Q3)                                                       | 20/32<br>(20/40, 20/20)                      |
| <b>OCT central subfield thickness (Stratus equivalent, <math>\mu</math>m)<sup>c</sup></b> |                                              |

| <b>Baseline Factors</b>                                                 | <b>Participants Treated with Ranibizumab</b> |
|-------------------------------------------------------------------------|----------------------------------------------|
| Median (Q1, Q3)                                                         | 222 (196, 265)                               |
| Mean $\pm$ SD                                                           | 257 $\pm$ 104                                |
| <b>Presence of DME<sup>c</sup>, N (%)</b>                               |                                              |
| No                                                                      | 123 (73.2%)                                  |
| Yes                                                                     | 45 (26.8%)                                   |
| <b>Neovascularization on clinical examination<sup>d</sup>, N (%)</b>    |                                              |
| NVD or NVE only                                                         | 108 (65.5%)                                  |
| NVD and NVE                                                             | 57 (34.5%)                                   |
| <b>Lens status on clinical examination, N (%)</b>                       |                                              |
| Phakic                                                                  | 18 (10.6%)                                   |
| Posterior chamber intraocular lens                                      | 152 (89.4%)                                  |
| <b>Diabetic retinopathy severity (ETDRS level)<sup>c,e</sup>, N (%)</b> |                                              |
| Severe NPDR or less ( $\leq$ level 53)                                  | 19 (11.3%)                                   |
| Inactive PDR (level 60)                                                 | 0                                            |
| Mild PDR (level 61)                                                     | 26 (15.5%)                                   |
| Moderate PDR (level 65)                                                 | 62 (36.9%)                                   |
| High risk PDR (level 71 and 75)                                         | 58 (34.5%)                                   |
| Advanced PDR (level 81 and 85)                                          | 3 (1.8%)                                     |
| <b>Prior treatment for DME, N (%)</b>                                   |                                              |
| No                                                                      | 130 (76.5%)                                  |
| Yes                                                                     | 40 (23.5%)                                   |
| <b>Prior focal/grid laser for DME, N (%)</b>                            |                                              |
| No                                                                      | 142 (83.5%)                                  |
| Yes                                                                     | 28 (16.5%)                                   |
| <b>Prior anti-VEGF treatment for DME, N (%)</b>                         |                                              |
| No                                                                      | 150 (88.2%)                                  |
| Yes                                                                     | 20 (11.8%)                                   |

Abbreviations: OCT, optical coherence tomography; DME, diabetic macular edema; NVD, neovascularization of the disc; NVE, neovascularization elsewhere; ETDRS, Early Treatment Diabetic Retinopathy Study; PDR, proliferative diabetic retinopathy; VEGF, vascular endothelial growth factor.

<sup>a</sup> Unavailable for 6 participants.

<sup>b</sup> Visual acuity letter scores indicate best-corrected visual acuity in the study eye following protocol-defined refraction. Visual acuity was measured using electronic Early Treatment for Diabetic Retinopathy Study (ETDRS) visual acuity testing; higher letter scores indicate better vision.

<sup>c</sup> Unavailable for 2 participants.

<sup>d</sup> Unavailable for 5 participants.

<sup>e</sup> Determined by central reading center on 7 standard stereo field fundus photographs.

**eTable 2. Multivariable analysis of baseline factors associated with a long lapse in care**

| <b>Baseline Study-Eye Factor</b>                                                         | <b>Odds Ratio<br/>(95% Confidence Interval)</b> | <b>P Value</b> |
|------------------------------------------------------------------------------------------|-------------------------------------------------|----------------|
| <b>Visual acuity letter score</b><br>(for every 5-letter decrease <sup>a</sup> )         | 1.21 (1.03, 1.43)                               | .02            |
| <b>Neovascularization clinical examination</b><br>(NVD and NVE vs. NVD only or NVE only) | 2.19 (1.09, 4.38)                               | .03            |
| <b>Prior focal/grid laser for DME</b><br>(No vs. Yes)                                    | 3.48 (1.38, 8.78)                               | .008           |

Abbreviations: DME, diabetic macular edema; NVD, neovascularization of the disc; NVE, neovascularization elsewhere.

A backward stepwise variable selection approach was used with entry selection criterion set at  $P \leq .10$  and stay criterion set at  $P \leq .05$ .

<sup>a</sup> A 5-letter difference in visual acuity letter score is equivalent to one Snellen line.

**eTable 3. Duration of follow-up at time of dropout and visual acuity at baseline and the last completed visit**

|                                                                                                 | Completed               | Dropped Out<br>in Year 4 or 5 <sup>b</sup> | Dropped Out<br>in Year 2 or 3 | Dropped Out<br>in Year 1 |
|-------------------------------------------------------------------------------------------------|-------------------------|--------------------------------------------|-------------------------------|--------------------------|
| <b>No. of Eyes</b>                                                                              | 120                     | 14                                         | 21                            | 15                       |
| <b>Baseline visual acuity letter score<sup>a</sup></b>                                          |                         |                                            |                               |                          |
| Mean ± SD                                                                                       | 77 ± 12                 | 72 ± 12                                    | 74 ± 10                       | 72 ± 13                  |
| Snellen equivalent,<br>Mean                                                                     | 20/32                   | 20/40                                      | 20/40                         | 20/40                    |
| Median (Q1, Q3)                                                                                 | 80 (75, 85)             | 72 (64, 81)                                | 76 (70, 81)                   | 77 (68, 81)              |
| Snellen equivalent,<br>Median (Q1, Q3)                                                          | 20/25<br>(20/32, 20/20) | 20/40<br>(20/50, 20/25)                    | 20/32<br>(20/40, 20/25)       | 20/32<br>(20/50, 20/25)  |
| <b>Visual acuity letter score at last completed visit<sup>b</sup></b>                           |                         |                                            |                               |                          |
| Mean ± SD                                                                                       | 79 ± 20                 | 77 ± 13                                    | 74 ± 20                       | 79 ± 11                  |
| Snellen equivalent,<br>Mean                                                                     | 20/32                   | 20/32                                      | 20/32                         | 20/25                    |
| Median (Q1, Q3)                                                                                 | 84 (78, 89)             | 84 (64, 86)                                | 78 (74, 82)                   | 83 (75, 86)              |
| Snellen equivalent,<br>Median (Q1, Q3)                                                          | 20/20<br>(20/32, 20/16) | 20/25<br>(20/50, 20/20)                    | 20/32<br>(20/32, 20/25)       | 20/25<br>(20/32, 20/20)  |
| <b>Change in visual acuity letter score from baseline at last completed visit<sup>a,b</sup></b> |                         |                                            |                               |                          |
| Mean ± SD                                                                                       | +1.5 ± 19.4             | +5.1 ± 12.3                                | +0.3 ± 18.4                   | +7.9 ± 7.0               |
| Median (Q1, Q3)                                                                                 | +4 (-2, +10)            | +9 (0, +13)                                | +5 (+1, +7)                   | +5 (+3, +10)             |

<sup>a</sup> Visual acuity letter scores indicate best-corrected visual acuity in the study eye following protocol-defined refraction. Visual acuity was measured using electronic Early Treatment for Diabetic Retinopathy Study (ETDRS) visual acuity testing; higher letter scores indicate better vision. A 5-letter difference in visual acuity letter score is equivalent to one Snellen line.

<sup>b</sup> Visual acuity was missing for 1 participant at the last completed visit. The last available visual acuity data was reported instead.
