# Supplementary material
Source: PubMed Central journal article supplement (PMC8532036)
Supplement: jamaophthalmol-e214103-s002.pdf [file jamaophthalmol-e214103-s002.pdf]

\*Indicates required information. Only first name, last name, and suffix will appear in PubMed.

| <b>*Group Name(s): The DRCR Retina Network</b> |                   |                              |                  |                                                |                                          |                                                         |                                                                                            |
|------------------------------------------------|-------------------|------------------------------|------------------|------------------------------------------------|------------------------------------------|---------------------------------------------------------|--------------------------------------------------------------------------------------------|
| <b>*First Name and Middle Initial(s)</b>       | <b>*Last Name</b> | <b>*Suffix (eg, Jr, III)</b> | Academic Degrees | Institution                                    | Location (city, state/province, country) | Role or Contribution, eg, chair, principal investigator | Group (if more than 1 Group listed in the byline) and/or Subgroup (eg, Steering Committee) |
| David                                          | Browning          |                              | MD, PhD          | Charlotte Eye, Ear, Nose and Throat Assoc., PA | Charlotte, NC US                         | Investigator                                            |                                                                                            |
| Andrew N.                                      | Antoszyk          |                              | MD               | Charlotte Eye, Ear, Nose and Throat Assoc., PA | Charlotte, NC US                         | Investigator                                            |                                                                                            |
| Angela K.                                      | Price             |                              | MPH              | Charlotte Eye, Ear, Nose and Throat Assoc., PA | Charlotte, NC US                         | Coordinator                                             |                                                                                            |
| Brittany A                                     | Murphy            |                              | BA, COT          | Charlotte Eye, Ear, Nose and Throat Assoc., PA | Charlotte, NC US                         | Coordinator                                             |                                                                                            |
| Christina J.                                   | Fleming           |                              | BS, CCRP         | Charlotte Eye, Ear, Nose and Throat Assoc., PA | Charlotte, NC US                         | Coordinator                                             |                                                                                            |
| Jenna T.                                       | Herby             |                              | BS, CCRC         | Charlotte Eye, Ear, Nose and Throat Assoc., PA | Charlotte, NC US                         | Coordinator                                             |                                                                                            |
| Merri F                                        | Walker            |                              |                  | Charlotte Eye, Ear, Nose and Throat Assoc., PA | Charlotte, NC US                         | Coordinator                                             |                                                                                            |
| Ashley A.                                      | McClain           |                              | BS, CRC          | Charlotte Eye, Ear, Nose and Throat Assoc., PA | Charlotte, NC US                         | Coordinator                                             |                                                                                            |
| Taylor S.                                      | Jones             |                              |                  | Charlotte Eye, Ear, Nose and Throat Assoc., PA | Charlotte, NC US                         | Coordinator                                             |                                                                                            |
| Sherry L.                                      | Fredenberg        |                              |                  | Charlotte Eye, Ear, Nose and Throat Assoc., PA | Charlotte, NC US                         | Coordinator                                             |                                                                                            |
| Sarah A.                                       | Ennis             |                              |                  | Charlotte Eye, Ear, Nose and Throat Assoc., PA | Charlotte, NC US                         | VA Tester                                               |                                                                                            |
| Autumn C.                                      | Grupp             |                              | COA              | Charlotte Eye, Ear, Nose and Throat Assoc., PA | Charlotte, NC US                         | VA Tester                                               |                                                                                            |
| Angella K.                                     | Gentile           |                              |                  | Charlotte Eye, Ear, Nose and Throat Assoc., PA | Charlotte, NC US                         | VA Tester                                               |                                                                                            |
| Kelly R                                        | Gallagher         |                              | BA, CCRC         | Charlotte Eye, Ear, Nose and Throat Assoc., PA | Charlotte, NC US                         | VA Tester                                               |                                                                                            |
| Erica                                          | Breglio           |                              |                  | Charlotte Eye, Ear, Nose and Throat Assoc., PA | Charlotte, NC US                         | VA Tester                                               |                                                                                            |

## Supplemental Online Content: Nonauthor Collaborators

\*Indicates required information. Only first name, last name, and suffix will appear in PubMed.

| *First Name and Middle Initial(s) | *Last Name | *Suffix (eg, Jr, III) | Academic Degrees | Institution                                    | Location (city, state/province, country) | Role or Contribution, eg, chair, principal investigator | Group (if more than 1 Group listed in the byline) and/or Subgroup (eg, Steering Committee) |
|-----------------------------------|------------|-----------------------|------------------|------------------------------------------------|------------------------------------------|---------------------------------------------------------|--------------------------------------------------------------------------------------------|
| Gina M.                           | Lester     |                       | COA              | Charlotte Eye, Ear, Nose and Throat Assoc., PA | Charlotte, NC US                         | VA Tester                                               |                                                                                            |
| Donna                             | McClain    |                       | COA              | Charlotte Eye, Ear, Nose and Throat Assoc., PA | Charlotte, NC US                         | Photographer                                            |                                                                                            |
| Carol A                           | Shore      |                       |                  | Charlotte Eye, Ear, Nose and Throat Assoc., PA | Charlotte, NC US                         | Photographer                                            |                                                                                            |
| Beverly O                         | Rowland    |                       |                  | Charlotte Eye, Ear, Nose and Throat Assoc., PA | Charlotte, NC US                         | Photographer                                            |                                                                                            |
| Kathryn                           | Kimrey     |                       |                  | Charlotte Eye, Ear, Nose and Throat Assoc., PA | Charlotte, NC US                         | Photographer                                            |                                                                                            |
| Loraine M.                        | Clark      |                       | COA              | Charlotte Eye, Ear, Nose and Throat Assoc., PA | Charlotte, NC US                         | Photographer                                            |                                                                                            |
| Lisa A.                           | Jackson    |                       |                  | Charlotte Eye, Ear, Nose and Throat Assoc., PA | Charlotte, NC US                         | Photographer                                            |                                                                                            |
| Lynn                              | Watson     |                       |                  | Charlotte Eye, Ear, Nose and Throat Assoc., PA | Charlotte, NC US                         | Photographer                                            |                                                                                            |
| Matt                              | Dunlap     |                       |                  | Charlotte Eye, Ear, Nose and Throat Assoc., PA | Charlotte, NC US                         | Photographer                                            |                                                                                            |
| Michael D.                        | McOwen     |                       |                  | Charlotte Eye, Ear, Nose and Throat Assoc., PA | Charlotte, NC US                         | Photographer                                            |                                                                                            |
| Robin                             | Kerr       |                       |                  | Charlotte Eye, Ear, Nose and Throat Assoc., PA | Charlotte, NC US                         | Photographer                                            |                                                                                            |
| Swann J                           | Bojaj      |                       |                  | Charlotte Eye, Ear, Nose and Throat Assoc., PA | Charlotte, NC US                         | Photographer                                            |                                                                                            |
| Jeff A.                           | Kuopus     |                       | COT              | Charlotte Eye, Ear, Nose and Throat Assoc., PA | Charlotte, NC US                         | Photographer                                            |                                                                                            |
| Joan P.                           | Mondello   |                       | COT              | Charlotte Eye, Ear, Nose and Throat Assoc., PA | Charlotte, NC US                         | Photographer                                            |                                                                                            |
| Autumn K.                         | Finch      |                       |                  | Charlotte Eye, Ear, Nose and Throat Assoc., PA | Charlotte, NC US                         | Photographer                                            |                                                                                            |

## Supplemental Online Content: Nonauthor Collaborators

\*Indicates required information. Only first name, last name, and suffix will appear in PubMed.

| *First Name and Middle Initial(s) | *Last Name       | *Suffix (eg, Jr, III) | Academic Degrees | Institution                                    | Location (city, state/province, country) | Role or Contribution, eg, chair, principal investigator | Group (if more than 1 Group listed in the byline) and/or Subgroup (eg, Steering Committee) |
|-----------------------------------|------------------|-----------------------|------------------|------------------------------------------------|------------------------------------------|---------------------------------------------------------|--------------------------------------------------------------------------------------------|
| Susannah J                        | Held             |                       | BA               | Charlotte Eye, Ear, Nose and Throat Assoc., PA | Charlotte, NC US                         | Photographer                                            |                                                                                            |
| Teneisha A.                       | Ragin            |                       |                  | Charlotte Eye, Ear, Nose and Throat Assoc., PA | Charlotte, NC US                         | Photographer                                            |                                                                                            |
| Uma M.                            | Balasubramaniam  |                       |                  | Charlotte Eye, Ear, Nose and Throat Assoc., PA | Charlotte, NC US                         | Photographer                                            |                                                                                            |
| Michael J.                        | Elman            |                       | MD               | Elman Retina Group, P.A.                       | Baltimore, MD US                         | Investigator                                            |                                                                                            |
| Henry A.                          | Leder            |                       | MD               | Elman Retina Group, P.A.                       | Baltimore, MD US                         | Investigator                                            |                                                                                            |
| JoAnn                             | Starr            |                       |                  | Elman Retina Group, P.A.                       | Baltimore, MD US                         | Coordinator                                             |                                                                                            |
| Jennifer L.                       | Belz             |                       |                  | Elman Retina Group, P.A.                       | Baltimore, MD US                         | Coordinator                                             |                                                                                            |
| Twyla J                           | Robinson         |                       |                  | Elman Retina Group, P.A.                       | Baltimore, MD US                         | Coordinator                                             |                                                                                            |
| Charlene K.                       | Putzulo          |                       |                  | Elman Retina Group, P.A.                       | Baltimore, MD US                         | Coordinator                                             |                                                                                            |
| Alesia K                          | McCalla          |                       |                  | Elman Retina Group, P.A.                       | Baltimore, MD US                         | VA Tester                                               |                                                                                            |
| Amy                               | Thompson         |                       |                  | Elman Retina Group, P.A.                       | Baltimore, MD US                         | VA Tester                                               |                                                                                            |
| Ashley                            | Davis            |                       |                  | Elman Retina Group, P.A.                       | Baltimore, MD US                         | VA Tester                                               |                                                                                            |
| Pamela V.                         | Singletary       |                       | C.O.A.           | Elman Retina Group, P.A.                       | Baltimore, MD US                         | VA Tester                                               |                                                                                            |
| Perel M.                          | Simpson          |                       | COA              | Elman Retina Group, P.A.                       | Baltimore, MD US                         | VA Tester                                               |                                                                                            |
| Teresa                            | Coffey           |                       |                  | Elman Retina Group, P.A.                       | Baltimore, MD US                         | VA Tester                                               |                                                                                            |
| Dena Y.                           | Salfer-Firestone |                       | C.O.A.           | Elman Retina Group, P.A.                       | Baltimore, MD US                         | VA Tester                                               |                                                                                            |
| Dallas R.                         | Sandler          |                       |                  | Elman Retina Group, P.A.                       | Baltimore, MD US                         | VA Tester                                               |                                                                                            |
| Jennifer L.                       | Simmons          |                       |                  | Elman Retina Group, P.A.                       | Baltimore, MD US                         | VA Tester                                               |                                                                                            |
| Peter                             | Sotirakos        |                       |                  | Elman Retina Group, P.A.                       | Baltimore, MD US                         | Photographer                                            |                                                                                            |
| Terri                             | Cain             |                       |                  | Elman Retina Group, P.A.                       | Baltimore, MD US                         | Photographer                                            |                                                                                            |
| Ashley M.                         | Metzger          |                       |                  | Elman Retina Group, P.A.                       | Baltimore, MD US                         | Photographer                                            |                                                                                            |
| Daniel J.                         | Ketner           |                       | CRA              | Elman Retina Group, P.A.                       | Baltimore, MD US                         | Photographer                                            |                                                                                            |
| Nader                             | Moinfar          |                       | MD, MPH          | Florida Retina Consultants                     | Lakeland, FL US                          | Investigator                                            |                                                                                            |
| Damanda F.                        | Fagan            |                       |                  | Florida Retina Consultants                     | Lakeland, FL US                          | Coordinator                                             |                                                                                            |
| Katrina L.                        | Dawson           |                       |                  | Florida Retina Consultants                     | Lakeland, FL US                          | Coordinator                                             |                                                                                            |
| Karen                             | Sjoblom          |                       |                  | Florida Retina Consultants                     | Lakeland, FL US                          | Coordinator                                             |                                                                                            |
| Kimberly A.                       | Williamson       |                       |                  | Florida Retina Consultants                     | Lakeland, FL US                          | Coordinator                                             |                                                                                            |

Supplemental Online Content: Nonauthor Collaborators

\*Indicates required information. Only first name, last name, and suffix will appear in PubMed.

| *First Name and Middle Initial(s) | *Last Name  | *Suffix (eg, Jr, III) | Academic Degrees | Institution                   | Location (city, state/province, country) | Role or Contribution, eg, chair, principal investigator | Group (if more than 1 Group listed in the byline) and/or Subgroup (eg, Steering Committee) |
|-----------------------------------|-------------|-----------------------|------------------|-------------------------------|------------------------------------------|---------------------------------------------------------|--------------------------------------------------------------------------------------------|
| Jacqueline                        | Andrews     |                       |                  | Florida Retina Consultants    | Lakeland, FL US                          | VA Tester                                               |                                                                                            |
| Paige N.                          | Walters     |                       |                  | Florida Retina Consultants    | Lakeland, FL US                          | VA Tester                                               |                                                                                            |
| Steve                             | Carlton     |                       |                  | Florida Retina Consultants    | Lakeland, FL US                          | Photographer                                            |                                                                                            |
| Allen                             | McKinney    |                       |                  | Florida Retina Consultants    | Lakeland, FL US                          | Photographer                                            |                                                                                            |
| Carl W.                           | Baker       |                       | MD               | Paducah Retinal Center        | PADUCAH, KY US                           | Investigator                                            |                                                                                            |
| Ron H.                            | Tilford     |                       | MD               | Paducah Retinal Center        | PADUCAH, KY US                           | Investigator                                            |                                                                                            |
| Tracey M.                         | Caldwell    |                       | CCRC             | Paducah Retinal Center        | PADUCAH, KY US                           | Coordinator                                             |                                                                                            |
| Jil D                             | Baker       |                       | MT, ASCP         | Paducah Retinal Center        | PADUCAH, KY US                           | Coordinator                                             |                                                                                            |
| Tracey R.                         | Martin      |                       | COA              | Paducah Retinal Center        | PADUCAH, KY US                           | VA Tester                                               |                                                                                            |
| Lynnette F.                       | Lambert     |                       | COT              | Paducah Retinal Center        | PADUCAH, KY US                           | VA Tester                                               |                                                                                            |
| Margaret J.                       | Orr         |                       | COA              | Paducah Retinal Center        | PADUCAH, KY US                           | VA Tester                                               |                                                                                            |
| Mary J.                           | Sharp       |                       | COA              | Paducah Retinal Center        | PADUCAH, KY US                           | VA Tester                                               |                                                                                            |
| Samantha                          | Kettler     |                       |                  | Paducah Retinal Center        | PADUCAH, KY US                           | Photographer                                            |                                                                                            |
| Tana R.                           | Williams    |                       | COA              | Paducah Retinal Center        | PADUCAH, KY US                           | Photographer                                            |                                                                                            |
| Kylie S.                          | Sedberry    |                       |                  | Paducah Retinal Center        | PADUCAH, KY US                           | Photographer                                            |                                                                                            |
| Alecia B.                         | Camp        |                       |                  | Paducah Retinal Center        | PADUCAH, KY US                           | Photographer                                            |                                                                                            |
| Dennis M.                         | Marcus      |                       | MD               | Southeast Retina Center, P.C. | Augusta, GA US                           | Investigator                                            |                                                                                            |
| Harinderjit                       | Singh       |                       | MD               | Southeast Retina Center, P.C. | Augusta, GA US                           | Investigator                                            |                                                                                            |
| Siobhan O.                        | Ortiz       |                       |                  | Southeast Retina Center, P.C. | Augusta, GA US                           | Coordinator                                             |                                                                                            |
| Teresa J.                         | Acklie      |                       |                  | Southeast Retina Center, P.C. | Augusta, GA US                           | Coordinator                                             |                                                                                            |
| Courtney N.                       | Roberts     |                       | BA               | Southeast Retina Center, P.C. | Augusta, GA US                           | Coordinator                                             |                                                                                            |
| Geri L                            | Floyd       |                       |                  | Southeast Retina Center, P.C. | Augusta, GA US                           | Coordinator                                             |                                                                                            |
| Amina                             | Farooq      |                       | MD               | Southeast Retina Center, P.C. | Augusta, GA US                           | Coordinator                                             |                                                                                            |
| Brook                             | Parsons     |                       |                  | Southeast Retina Center, P.C. | Augusta, GA US                           | VA Tester                                               |                                                                                            |
| Christy                           | Coursey     |                       |                  | Southeast Retina Center, P.C. | Augusta, GA US                           | VA Tester                                               |                                                                                            |
| Judith                            | Hendrickson |                       | OD               | Southeast Retina Center, P.C. | Augusta, GA US                           | VA Tester                                               |                                                                                            |
| Lindsay Allison                   | Foster      |                       |                  | Southeast Retina Center, P.C. | Augusta, GA US                           | VA Tester                                               |                                                                                            |
| Michele                           | Woodward    |                       |                  | Southeast Retina Center, P.C. | Augusta, GA US                           | VA Tester                                               |                                                                                            |
| Thomas                            | Bailey      |                       |                  | Southeast Retina Center, P.C. | Augusta, GA US                           | VA Tester                                               |                                                                                            |
| Virginia                          | Mims        |                       |                  | Southeast Retina Center, P.C. | Augusta, GA US                           | VA Tester                                               |                                                                                            |

## Supplemental Online Content: Nonauthor Collaborators

\*Indicates required information. Only first name, last name, and suffix will appear in PubMed.

| *First Name and Middle Initial(s) | *Last Name  | *Suffix (eg, Jr, III) | Academic Degrees | Institution                   | Location (city, state/province, country) | Role or Contribution, eg, chair, principal investigator | Group (if more than 1 Group listed in the byline) and/or Subgroup (eg, Steering Committee) |
|-----------------------------------|-------------|-----------------------|------------------|-------------------------------|------------------------------------------|---------------------------------------------------------|--------------------------------------------------------------------------------------------|
| Ken                               | Ivey        |                       | COA              | Southeast Retina Center, P.C. | Augusta, GA US                           | Photographer                                            |                                                                                            |
| Kimbi Y.                          | Overton     |                       |                  | Southeast Retina Center, P.C. | Augusta, GA US                           | Photographer                                            |                                                                                            |
| Jared C.                          | Gardner     |                       |                  | Southeast Retina Center, P.C. | Augusta, GA US                           | Photographer                                            |                                                                                            |
| Brian B.                          | Berger      |                       | MD               | Retina Research Center        | Austin, TX US                            | Investigator                                            |                                                                                            |
| Chirag D.                         | Jhaveri     |                       | MD               | Retina Research Center        | Austin, TX US                            | Investigator                                            |                                                                                            |
| Saradha                           | Chexal      |                       | MD               | Retina Research Center        | Austin, TX US                            | Investigator                                            |                                                                                            |
| Daniela Mariel                    | Wilson      |                       |                  | Retina Research Center        | Austin, TX US                            | Coordinator                                             |                                                                                            |
| Tori                              | Moore       |                       | BS               | Retina Research Center        | Austin, TX US                            | Coordinator                                             |                                                                                            |
| Tina A                            | Seidu       |                       |                  | Retina Research Center        | Austin, TX US                            | Coordinator                                             |                                                                                            |
| Ginger J.                         | Manhart     |                       |                  | Retina Research Center        | Austin, TX US                            | Coordinator                                             |                                                                                            |
| Ivana                             | Gunderson   |                       |                  | Retina Research Center        | Austin, TX US                            | Coordinator                                             |                                                                                            |
| Jenny J.                          | Tracy       |                       | BA               | Retina Research Center        | Austin, TX US                            | Coordinator                                             |                                                                                            |
| Kimberly                          | Hosein      |                       |                  | Retina Research Center        | Austin, TX US                            | Coordinator                                             |                                                                                            |
| Ryan M.                           | Reid        |                       |                  | Retina Research Center        | Austin, TX US                            | Coordinator                                             |                                                                                            |
| Rachel A.                         | Walsh       |                       |                  | Retina Research Center        | Austin, TX US                            | Coordinator                                             |                                                                                            |
| Angela N.                         | Palacios    |                       |                  | Retina Research Center        | Austin, TX US                            | VA Tester                                               |                                                                                            |
| Chelsey A.                        | Bravenec    |                       |                  | Retina Research Center        | Austin, TX US                            | VA Tester                                               |                                                                                            |
| Bianca                            | Luong       |                       |                  | Retina Research Center        | Austin, TX US                            | VA Tester                                               |                                                                                            |
| Brandon                           | Nguyen      |                       |                  | Retina Research Center        | Austin, TX US                            | VA Tester                                               |                                                                                            |
| Dietrich                          | Riepen      |                       |                  | Retina Research Center        | Austin, TX US                            | VA Tester                                               |                                                                                            |
| Ben                               | Ostrander   |                       |                  | Retina Research Center        | Austin, TX US                            | Photographer                                            |                                                                                            |
| Boris                             | Corak       |                       | BS               | Retina Research Center        | Austin, TX US                            | Photographer                                            |                                                                                            |
| Christopher C.                    | Stovall     |                       |                  | Retina Research Center        | Austin, TX US                            | Photographer                                            |                                                                                            |
| Yong                              | Ren         |                       |                  | Retina Research Center        | Austin, TX US                            | Photographer                                            |                                                                                            |
| Erik                              | Rocha       |                       |                  | Retina Research Center        | Austin, TX US                            | Photographer                                            |                                                                                            |
| Dante J.                          | Pieramici   |                       | MD               | California Retina Consultants | SANTA BARBARA, CA US                     | Investigator                                            |                                                                                            |
| Alessandro A.                     | Castellarin |                       | MD               | California Retina Consultants | SANTA BARBARA, CA US                     | Investigator                                            |                                                                                            |
| Gina                              | Hong        |                       | BS, BA           | California Retina Consultants | SANTA BARBARA, CA US                     | Coordinator                                             |                                                                                            |

Supplemental Online Content: Nonauthor Collaborators

\*Indicates required information. Only first name, last name, and suffix will appear in PubMed.

| *First Name and Middle Initial(s) | *Last Name | *Suffix (eg, Jr, III) | Academic Degrees | Institution                   | Location (city, state/province, country) | Role or Contribution, eg, chair, principal investigator | Group (if more than 1 Group listed in the byline) and/or Subgroup (eg, Steering Committee) |
|-----------------------------------|------------|-----------------------|------------------|-------------------------------|------------------------------------------|---------------------------------------------------------|--------------------------------------------------------------------------------------------|
| Jack                              | Giust      |                       | BS               | California Retina Consultants | SANTA BARBARA, CA US                     | Coordinator                                             |                                                                                            |
| John                              | McDermott  |                       |                  | California Retina Consultants | SANTA BARBARA, CA US                     | Coordinator                                             |                                                                                            |
| Erica D.                          | Morasse    |                       | BA               | California Retina Consultants | SANTA BARBARA, CA US                     | Coordinator                                             |                                                                                            |
| Layne J.                          | Bone       |                       | AS               | California Retina Consultants | SANTA BARBARA, CA US                     | Coordinator                                             |                                                                                            |
| Lisha                             | Wan        |                       | BA               | California Retina Consultants | SANTA BARBARA, CA US                     | Coordinator                                             |                                                                                            |
| Timothy                           | Do         |                       | BS               | California Retina Consultants | SANTA BARBARA, CA US                     | Coordinator                                             |                                                                                            |
| Michelle S.                       | Hanna      |                       | BS               | California Retina Consultants | SANTA BARBARA, CA US                     | Coordinator                                             |                                                                                            |
| Melvin D.                         | Rabena     |                       | BS               | California Retina Consultants | SANTA BARBARA, CA US                     | Coordinator                                             |                                                                                            |
| Sara                              | Esau       |                       |                  | California Retina Consultants | SANTA BARBARA, CA US                     | Coordinator                                             |                                                                                            |
| Sarah                             | Fishbein   |                       |                  | California Retina Consultants | SANTA BARBARA, CA US                     | Coordinator                                             |                                                                                            |
| Jerry                             | Smith      |                       |                  | California Retina Consultants | SANTA BARBARA, CA US                     | VA Tester                                               |                                                                                            |
| Kelly                             | Avery      |                       |                  | California Retina Consultants | SANTA BARBARA, CA US                     | VA Tester                                               |                                                                                            |
| Matthew                           | Giust      |                       |                  | California Retina Consultants | SANTA BARBARA, CA US                     | Photographer                                            |                                                                                            |
| Susan                             | Spaeth     |                       |                  | California Retina Consultants | SANTA BARBARA, CA US                     | Photographer                                            |                                                                                            |
| Nitce L.                          | Ruvalcaba  |                       |                  | California Retina Consultants | SANTA BARBARA, CA US                     | Photographer                                            |                                                                                            |

## Supplemental Online Content: Nonauthor Collaborators

\*Indicates required information. Only first name, last name, and suffix will appear in PubMed.

| *First Name and Middle Initial(s) | *Last Name | *Suffix (eg, Jr, III) | Academic Degrees | Institution                   | Location (city, state/province, country) | Role or Contribution, eg, chair, principal investigator | Group (if more than 1 Group listed in the byline) and/or Subgroup (eg, Steering Committee) |
|-----------------------------------|------------|-----------------------|------------------|-------------------------------|------------------------------------------|---------------------------------------------------------|--------------------------------------------------------------------------------------------|
| Aimee H.                          | Shook      |                       | BS               | California Retina Consultants | SANTA BARBARA, CA US                     | Photographer                                            |                                                                                            |
| Aimee                             | Walker     |                       |                  | California Retina Consultants | SANTA BARBARA, CA US                     | Photographer                                            |                                                                                            |
| Jeffrey G.                        | Gross      |                       | MD               | Carolina Retina Center        | Columbia, SC US                          | Investigator                                            |                                                                                            |
| Michael A.                        | Magee      |                       | MD               | Carolina Retina Center        | Columbia, SC US                          | Investigator                                            |                                                                                            |
| Barron C.                         | Fishburne  |                       | MD               | Carolina Retina Center        | Columbia, SC US                          | Investigator                                            |                                                                                            |
| Vincent                           | Klapper    |                       |                  | Carolina Retina Center        | Columbia, SC US                          | Coordinator                                             |                                                                                            |
| Riley                             | Stroman    |                       |                  | Carolina Retina Center        | Columbia, SC US                          | Coordinator                                             |                                                                                            |
| Christen                          | Ochieng    |                       | BS               | Carolina Retina Center        | Columbia, SC US                          | Coordinator                                             |                                                                                            |
| Amy M.                            | Flowers    |                       | BA               | Carolina Retina Center        | Columbia, SC US                          | Coordinator                                             |                                                                                            |
| Joel                              | Gross      |                       |                  | Carolina Retina Center        | Columbia, SC US                          | Coordinator                                             |                                                                                            |
| Angelique SA                      | McDowell   |                       | BS               | Carolina Retina Center        | Columbia, SC US                          | VA Tester                                               |                                                                                            |
| Hunter                            | Matthews   |                       |                  | Carolina Retina Center        | Columbia, SC US                          | Photographer                                            |                                                                                            |
| Randall L.                        | Price      | II                    | B.A.             | Carolina Retina Center        | Columbia, SC US                          | Photographer                                            |                                                                                            |
| Michel                            | Shami      |                       | MD               | Texas Retina Associates       | Lubbock, TX US                           | Investigator                                            |                                                                                            |
| Sushma K.                         | Vance      |                       | MD               | Texas Retina Associates       | Lubbock, TX US                           | Investigator                                            |                                                                                            |
| Yolanda                           | Saldivar   |                       |                  | Texas Retina Associates       | Lubbock, TX US                           | Coordinator                                             |                                                                                            |
| Keri S.                           | Neuling    |                       | CMA, CCRC        | Texas Retina Associates       | Lubbock, TX US                           | Coordinator                                             |                                                                                            |
| Brenda K.                         | Arrington  |                       | CRA, COT         | Texas Retina Associates       | Lubbock, TX US                           | Coordinator                                             |                                                                                            |
| Ashaki                            | Meeks      |                       |                  | Texas Retina Associates       | Lubbock, TX US                           | VA Tester                                               |                                                                                            |
| Natalie R.                        | Garcia     |                       | COA              | Texas Retina Associates       | Lubbock, TX US                           | VA Tester                                               |                                                                                            |
| Glenn R                           | Gardner    |                       | CRA              | Texas Retina Associates       | Lubbock, TX US                           | Photographer                                            |                                                                                            |
| Ginger K.                         | Rhymes     |                       | COA              | Texas Retina Associates       | Lubbock, TX US                           | Photographer                                            |                                                                                            |
| Janet                             | Medrano    |                       |                  | Texas Retina Associates       | Lubbock, TX US                           | Photographer                                            |                                                                                            |
| Kayla                             | Blair      |                       | CST              | Texas Retina Associates       | Lubbock, TX US                           | Photographer                                            |                                                                                            |
| Stuart K.                         | Burgess    |                       | MD               | Fort Lauderdale Eye Institute | Plantation, FL US                        | Investigator                                            |                                                                                            |
| Tirso M.                          | Lara       |                       | MD               | Fort Lauderdale Eye Institute | Plantation, FL US                        | Investigator                                            |                                                                                            |
| Noel H.                           | Pereda     |                       | MD               | Fort Lauderdale Eye Institute | Plantation, FL US                        | Coordinator                                             |                                                                                            |
| Cindy V.                          | Fernandez  |                       | MD               | Fort Lauderdale Eye Institute | Plantation, FL US                        | Coordinator                                             |                                                                                            |

## Supplemental Online Content: Nonauthor Collaborators

\*Indicates required information. Only first name, last name, and suffix will appear in PubMed.

| *First Name and Middle Initial(s) | *Last Name  | *Suffix (eg, Jr, III) | Academic Degrees | Institution                                | Location (city, state/province, country) | Role or Contribution, eg, chair, principal investigator | Group (if more than 1 Group listed in the byline) and/or Subgroup (eg, Steering Committee) |
|-----------------------------------|-------------|-----------------------|------------------|--------------------------------------------|------------------------------------------|---------------------------------------------------------|--------------------------------------------------------------------------------------------|
| Deborah                           | Davis       |                       |                  | Fort Lauderdale Eye Institute              | Plantation, FL US                        | VA Tester                                               |                                                                                            |
| Evelyn                            | Quinchia    |                       |                  | Fort Lauderdale Eye Institute              | Plantation, FL US                        | VA Tester                                               |                                                                                            |
| Karen                             | Workman     |                       |                  | Fort Lauderdale Eye Institute              | Plantation, FL US                        | Photographer                                            |                                                                                            |
| Thomas W.                         | Gardner     |                       | M.D., M.S.       | Kellogg Eye Center, University of Michigan | Ann Arbor, MI US                         | Investigator                                            |                                                                                            |
| Grant M.                          | Comer       |                       | MD, MS           | Kellogg Eye Center, University of Michigan | Ann Arbor, MI US                         | Investigator                                            |                                                                                            |
| Laxmi V.                          | Devisetty   |                       | MD               | Kellogg Eye Center, University of Michigan | Ann Arbor, MI US                         | Investigator                                            |                                                                                            |
| Robin D.                          | Ross        |                       | MD               | Kellogg Eye Center, University of Michigan | Ann Arbor, MI US                         | Investigator                                            |                                                                                            |
| Pamela S.                         | Campbell    |                       | COT, CCRP        | Kellogg Eye Center, University of Michigan | Ann Arbor, MI US                         | Coordinator                                             |                                                                                            |
| Karen                             | King        |                       | BA, CCRC         | Kellogg Eye Center, University of Michigan | Ann Arbor, MI US                         | Coordinator                                             |                                                                                            |
| Lindsay M.                        | Godsey      |                       | MS               | Kellogg Eye Center, University of Michigan | Ann Arbor, MI US                         | Coordinator                                             |                                                                                            |
| Tracy M.                          | Utlely      |                       | COMT             | Kellogg Eye Center, University of Michigan | Ann Arbor, MI US                         | Coordinator                                             |                                                                                            |
| Susan M.                          | Sanford     |                       | RN               | Kellogg Eye Center, University of Michigan | Ann Arbor, MI US                         | Coordinator                                             |                                                                                            |
| Laura A                           | Rozek       |                       |                  | Kellogg Eye Center, University of Michigan | Ann Arbor, MI US                         | Photographer                                            |                                                                                            |
| Linda                             | Fournier    |                       | COA              | Kellogg Eye Center, University of Michigan | Ann Arbor, MI US                         | VA Tester                                               |                                                                                            |
| Mary D.                           | Walker      |                       | COA              | Kellogg Eye Center, University of Michigan | Ann Arbor, MI US                         | VA Tester                                               |                                                                                            |
| Moe                               | Hesselgrave |                       | COA              | Kellogg Eye Center, University of Michigan | Ann Arbor, MI US                         | VA Tester                                               |                                                                                            |
| Shannon                           | Henderson   |                       | COA              | Kellogg Eye Center, University of Michigan | Ann Arbor, MI US                         | VA Tester                                               |                                                                                            |



## Supplemental Online Content: Nonauthor Collaborators

\*Indicates required information. Only first name, last name, and suffix will appear in PubMed.

| *First Name and Middle Initial(s) | *Last Name  | *Suffix (eg, Jr, III) | Academic Degrees | Institution                                | Location (city, state/province, country) | Role or Contribution, eg, chair, principal investigator | Group (if more than 1 Group listed in the byline) and/or Subgroup (eg, Steering Committee) |
|-----------------------------------|-------------|-----------------------|------------------|--------------------------------------------|------------------------------------------|---------------------------------------------------------|--------------------------------------------------------------------------------------------|
| Robert                            | Prusak      |                       |                  | Kellogg Eye Center, University of Michigan | Ann Arbor, MI US                         | Photographer                                            |                                                                                            |
| Matthew S.                        | Lawrence    |                       | CRA              | Kellogg Eye Center, University of Michigan | Ann Arbor, MI US                         | Photographer                                            |                                                                                            |
| Linda                             | Goings      |                       |                  | Kellogg Eye Center, University of Michigan | Ann Arbor, MI US                         | Photographer                                            |                                                                                            |
| Laura B                           | Trebesch    |                       |                  | Kellogg Eye Center, University of Michigan | Ann Arbor, MI US                         | Photographer                                            |                                                                                            |
| Hillary                           | Bernard     |                       |                  | Kellogg Eye Center, University of Michigan | Ann Arbor, MI US                         | Photographer                                            |                                                                                            |
| Joanie H.                         | Lippincott  |                       | COA              | Kellogg Eye Center, University of Michigan | Ann Arbor, MI US                         | Photographer                                            |                                                                                            |
| Anthony                           | Medina      |                       | CRA              | Kellogg Eye Center, University of Michigan | Ann Arbor, MI US                         | Photographer                                            |                                                                                            |
| Alexis L.                         | Smith       |                       |                  | Kellogg Eye Center, University of Michigan | Ann Arbor, MI US                         | Photographer                                            |                                                                                            |
| Timothy                           | Steffens    |                       | CRA              | Kellogg Eye Center, University of Michigan | Ann Arbor, MI US                         | Photographer                                            |                                                                                            |
| Victor Hugo                       | Gonzalez    |                       | MD               | Valley Retina Institute                    | McAllen, TX US                           | Investigator                                            |                                                                                            |
| Nehal R.                          | Patel       |                       | MD               | Valley Retina Institute                    | McAllen, TX US                           | Investigator                                            |                                                                                            |
| Rohit                             | Adyanthaya  |                       | MD               | Valley Retina Institute                    | McAllen, TX US                           | Investigator                                            |                                                                                            |
| Roberto                           | Diaz-Rohena |                       | MD, FACS         | Valley Retina Institute                    | McAllen, TX US                           | Investigator                                            |                                                                                            |
| Yesenia                           | Salinas     |                       | CRC              | Valley Retina Institute                    | McAllen, TX US                           | Coordinator                                             |                                                                                            |
| Ruth                              | Iracheta    |                       |                  | Valley Retina Institute                    | McAllen, TX US                           | Coordinator                                             |                                                                                            |
| Crystal A.                        | Alvarez     |                       | BS               | Valley Retina Institute                    | McAllen, TX US                           | Coordinator                                             |                                                                                            |
| Jessica                           | Rodriguez   |                       |                  | Valley Retina Institute                    | McAllen, TX US                           | Coordinator                                             |                                                                                            |
| Kethsaly J.                       | Salinas     |                       | BS               | Valley Retina Institute                    | McAllen, TX US                           | Coordinator                                             |                                                                                            |
| Angelina                          | Garza       |                       | B.S.             | Valley Retina Institute                    | McAllen, TX US                           | Coordinator                                             |                                                                                            |
| Amber B                           | Ibarra      |                       | BS               | Valley Retina Institute                    | McAllen, TX US                           | Coordinator                                             |                                                                                            |
| Ana L                             | Pina        |                       | B.A.             | Valley Retina Institute                    | McAllen, TX US                           | Coordinator                                             |                                                                                            |

## Supplemental Online Content: Nonauthor Collaborators

\*Indicates required information. Only first name, last name, and suffix will appear in PubMed.

| *First Name and Middle Initial(s) | *Last Name | *Suffix (eg, Jr, III) | Academic Degrees | Institution             | Location (city, state/province, country) | Role or Contribution, eg, chair, principal investigator | Group (if more than 1 Group listed in the byline) and/or Subgroup (eg, Steering Committee) |
|-----------------------------------|------------|-----------------------|------------------|-------------------------|------------------------------------------|---------------------------------------------------------|--------------------------------------------------------------------------------------------|
| Deyla                             | Anaya      |                       |                  | Valley Retina Institute | McAllen, TX US                           | Coordinator                                             |                                                                                            |
| Edna E.                           | Cruz       |                       |                  | Valley Retina Institute | McAllen, TX US                           | Coordinator                                             |                                                                                            |
| Gabriela                          | Zavala     |                       | BS               | Valley Retina Institute | McAllen, TX US                           | Coordinator                                             |                                                                                            |
| Hector                            | Jasso      |                       | MA               | Valley Retina Institute | McAllen, TX US                           | VA Tester                                               |                                                                                            |
| Isaac                             | Cabrera    |                       |                  | Valley Retina Institute | McAllen, TX US                           | VA Tester                                               |                                                                                            |
| Janette                           | Arredondo  |                       |                  | Valley Retina Institute | McAllen, TX US                           | VA Tester                                               |                                                                                            |
| Ashley                            | Leal       |                       |                  | Valley Retina Institute | McAllen, TX US                           | VA Tester                                               |                                                                                            |
| Krystle R.                        | Lozano     |                       |                  | Valley Retina Institute | McAllen, TX US                           | VA Tester                                               |                                                                                            |
| Karina                            | Miranda    |                       | CMA              | Valley Retina Institute | McAllen, TX US                           | VA Tester                                               |                                                                                            |
| Jennifer                          | Moreno     |                       |                  | Valley Retina Institute | McAllen, TX US                           | VA Tester                                               |                                                                                            |
| Christina                         | Villegas   |                       |                  | Valley Retina Institute | McAllen, TX US                           | VA Tester                                               |                                                                                            |
| Rachel                            | Rodriguez  |                       | MA               | Valley Retina Institute | McAllen, TX US                           | VA Tester                                               |                                                                                            |
| Rebecca R.                        | Flores     |                       | COA              | Valley Retina Institute | McAllen, TX US                           | VA Tester                                               |                                                                                            |
| Yvonne                            | Diaz       |                       |                  | Valley Retina Institute | McAllen, TX US                           | VA Tester                                               |                                                                                            |
| Monica R.                         | Cantu      |                       | COT              | Valley Retina Institute | McAllen, TX US                           | VA Tester                                               |                                                                                            |
| Maricela                          | Garza      |                       | MA               | Valley Retina Institute | McAllen, TX US                           | VA Tester                                               |                                                                                            |
| Tiffany                           | Gonzalez   |                       |                  | Valley Retina Institute | McAllen, TX US                           | VA Tester                                               |                                                                                            |
| Tabitha                           | Trevino    |                       |                  | Valley Retina Institute | McAllen, TX US                           | VA Tester                                               |                                                                                            |
| Monique                           | Montemayor |                       | COA              | Valley Retina Institute | McAllen, TX US                           | Photographer                                            |                                                                                            |
| Samuel                            | Alonso     |                       |                  | Valley Retina Institute | McAllen, TX US                           | Photographer                                            |                                                                                            |
| Santos                            | Garza      |                       |                  | Valley Retina Institute | McAllen, TX US                           | Photographer                                            |                                                                                            |
| John                              | Trevino    |                       |                  | Valley Retina Institute | McAllen, TX US                           | Photographer                                            |                                                                                            |
| Lazaro                            | Aguero     |                       | MD               | Valley Retina Institute | McAllen, TX US                           | Photographer                                            |                                                                                            |
| Amanda L.                         | Sandoval   |                       | MA               | Valley Retina Institute | McAllen, TX US                           | Photographer                                            |                                                                                            |
| Mark A.                           | Peters     |                       | MD, FACS         | Retina Northwest, PC    | Portland, OR US                          | Investigator                                            |                                                                                            |
| Michael S.                        | Lee        |                       | MD               | Retina Northwest, PC    | Portland, OR US                          | Investigator                                            |                                                                                            |
| Colin                             | Ma         |                       | MD               | Retina Northwest, PC    | Portland, OR US                          | Investigator                                            |                                                                                            |
| Paul S.                           | Tluczek    |                       | MD               | Retina Northwest, PC    | Portland, OR US                          | Investigator                                            |                                                                                            |
| Brian S                           | Puckett    |                       |                  | Retina Northwest, PC    | Portland, OR US                          | Coordinator                                             |                                                                                            |
| Stephen                           | Hobbs      |                       |                  | Retina Northwest, PC    | Portland, OR US                          | Coordinator                                             |                                                                                            |

## Supplemental Online Content: Nonauthor Collaborators

\*Indicates required information. Only first name, last name, and suffix will appear in PubMed.

| *First Name and Middle Initial(s) | *Last Name  | *Suffix (eg, Jr, III) | Academic Degrees | Institution                        | Location (city, state/province, country) | Role or Contribution, eg, chair, principal investigator | Group (if more than 1 Group listed in the byline) and/or Subgroup (eg, Steering Committee) |
|-----------------------------------|-------------|-----------------------|------------------|------------------------------------|------------------------------------------|---------------------------------------------------------|--------------------------------------------------------------------------------------------|
| Stephanie L.                      | Ho          |                       | BA               | Retina Northwest, PC               | Portland, OR US                          | Coordinator                                             |                                                                                            |
| Pualani                           | Smith       |                       |                  | Retina Northwest, PC               | Portland, OR US                          | Coordinator                                             |                                                                                            |
| Amanda C.                         | Milliron    |                       |                  | Retina Northwest, PC               | Portland, OR US                          | VA Tester                                               |                                                                                            |
| Margaret E                        | Charpentier |                       |                  | Retina Northwest, PC               | Portland, OR US                          | VA Tester                                               |                                                                                            |
| Marcia                            | Kopfer      |                       | BS, COT          | Retina Northwest, PC               | Portland, OR US                          | VA Tester                                               |                                                                                            |
| Joe                               | Logan       |                       | AA               | Retina Northwest, PC               | Portland, OR US                          | Photographer                                            |                                                                                            |
| Christine                         | Hoerner     |                       |                  | Retina Northwest, PC               | Portland, OR US                          | Photographer                                            |                                                                                            |
| Calvin E.                         | Mein        |                       | MD               | Retinal Consultants of San Antonio | San Antonio, TX US                       | Investigator                                            |                                                                                            |
| Moises A.                         | Chica       |                       | MD               | Retinal Consultants of San Antonio | San Antonio, TX US                       | Investigator                                            |                                                                                            |
| Richard Gary                      | Lane        | II                    | MD               | Retinal Consultants of San Antonio | San Antonio, TX US                       | Investigator                                            |                                                                                            |
| Sarah Elizabeth                   | Holy        |                       | MD               | Retinal Consultants of San Antonio | San Antonio, TX US                       | Investigator                                            |                                                                                            |
| Lita                              | Kirschbaum  |                       | COA              | Retinal Consultants of San Antonio | San Antonio, TX US                       | Coordinator                                             |                                                                                            |
| Jayne                             | Baker       |                       |                  | Retinal Consultants of San Antonio | San Antonio, TX US                       | Coordinator                                             |                                                                                            |
| Tori R.                           | Moore       |                       | BS               | Retinal Consultants of San Antonio | San Antonio, TX US                       | Coordinator                                             |                                                                                            |
| Vanessa D                         | Martinez    |                       |                  | Retinal Consultants of San Antonio | San Antonio, TX US                       | Coordinator                                             |                                                                                            |
| Adriana A.                        | Lopez       |                       |                  | Retinal Consultants of San Antonio | San Antonio, TX US                       | Coordinator                                             |                                                                                            |
| Elaine                            | Castillo    |                       |                  | Retinal Consultants of San Antonio | San Antonio, TX US                       | Photographer                                            |                                                                                            |
| Christa G.                        | Kincaid     |                       |                  | Retinal Consultants of San Antonio | San Antonio, TX US                       | VA Tester                                               |                                                                                            |
| Clarissa M.                       | Marquez     |                       |                  | Retinal Consultants of San Antonio | San Antonio, TX US                       | Photographer                                            |                                                                                            |

## Supplemental Online Content: Nonauthor Collaborators

\*Indicates required information. Only first name, last name, and suffix will appear in PubMed.

| *First Name and Middle Initial(s) | *Last Name  | *Suffix (eg, Jr, III) | Academic Degrees | Institution                        | Location (city, state/province, country) | Role or Contribution, eg, chair, principal investigator | Group (if more than 1 Group listed in the byline) and/or Subgroup (eg, Steering Committee) |
|-----------------------------------|-------------|-----------------------|------------------|------------------------------------|------------------------------------------|---------------------------------------------------------|--------------------------------------------------------------------------------------------|
| Christopher Sean                  | Wienecke    |                       |                  | Retinal Consultants of San Antonio | San Antonio, TX US                       | Photographer                                            |                                                                                            |
| Jorge                             | Castellanos |                       |                  | Retinal Consultants of San Antonio | San Antonio, TX US                       | Photographer                                            |                                                                                            |
| Sara L                            | Schlichting |                       |                  | Retinal Consultants of San Antonio | San Antonio, TX US                       | Photographer                                            |                                                                                            |
| Brenda                            | Nakoski     |                       |                  | Retinal Consultants of San Antonio | San Antonio, TX US                       | Photographer                                            |                                                                                            |
| Frank J.                          | McCabe      |                       | MD               | Vitreo-Retinal Associates, PC      | Worcester, MA US                         | Investigator                                            |                                                                                            |
| Brad J.                           | Baker       |                       | MD               | Vitreo-Retinal Associates, PC      | Worcester, MA US                         | Investigator                                            |                                                                                            |
| Melvyn H.                         | Defrin      |                       | MD               | Vitreo-Retinal Associates, PC      | Worcester, MA US                         | Investigator                                            |                                                                                            |
| Marie V.                          | Lampson     |                       | COA              | Vitreo-Retinal Associates, PC      | Worcester, MA US                         | Coordinator                                             |                                                                                            |
| Selena A.                         | Baron       |                       |                  | Vitreo-Retinal Associates, PC      | Worcester, MA US                         | VA Tester                                               |                                                                                            |
| Christina                         | Cartagena   |                       |                  | Vitreo-Retinal Associates, PC      | Worcester, MA US                         | VA Tester                                               |                                                                                            |
| Elizabeth                         | White       |                       |                  | Vitreo-Retinal Associates, PC      | Worcester, MA US                         | VA Tester                                               |                                                                                            |
| Aundrea S.                        | Borelli     |                       | COT              | Vitreo-Retinal Associates, PC      | Worcester, MA US                         | VA Tester                                               |                                                                                            |
| Amy                               | Paul        |                       |                  | Vitreo-Retinal Associates, PC      | Worcester, MA US                         | VA Tester                                               |                                                                                            |
| Heather                           | Pratte      |                       | COA              | Vitreo-Retinal Associates, PC      | Worcester, MA US                         | VA Tester                                               |                                                                                            |
| Jennifer                          | Risi        |                       |                  | Vitreo-Retinal Associates, PC      | Worcester, MA US                         | VA Tester                                               |                                                                                            |
| Charles C.                        | Wykoff      |                       | MD, PhD          | Retina Consultants of Houston, PA  | HOUSTON, TX US                           | Investigator                                            |                                                                                            |
| David M.                          | Brown       |                       | MD, FACS         | Retina Consultants of Houston, PA  | HOUSTON, TX US                           | Investigator                                            |                                                                                            |
| Eric                              | Chen        |                       | MD               | Retina Consultants of Houston, PA  | HOUSTON, TX US                           | Investigator                                            |                                                                                            |
| James C.                          | Major       | Jr.                   | MD               | Retina Consultants of Houston, PA  | HOUSTON, TX US                           | Investigator                                            |                                                                                            |
| Amy C.                            | Schefler    |                       | MD               | Retina Consultants of Houston, PA  | HOUSTON, TX US                           | Investigator                                            |                                                                                            |
| Matthew S.                        | Benz        |                       | MD               | Retina Consultants of Houston, PA  | HOUSTON, TX US                           | Investigator                                            |                                                                                            |

## Supplemental Online Content: Nonauthor Collaborators

\*Indicates required information. Only first name, last name, and suffix will appear in PubMed.

| *First Name and Middle Initial(s) | *Last Name | *Suffix (eg, Jr, III) | Academic Degrees | Institution                       | Location (city, state/province, country) | Role or Contribution, eg, chair, principal investigator | Group (if more than 1 Group listed in the byline) and/or Subgroup (eg, Steering Committee) |
|-----------------------------------|------------|-----------------------|------------------|-----------------------------------|------------------------------------------|---------------------------------------------------------|--------------------------------------------------------------------------------------------|
| Richard H.                        | Fish       |                       | MD, FACS         | Retina Consultants of Houston, PA | HOUSTON, TX US                           | Investigator                                            |                                                                                            |
| Rosa Y.                           | Kim        |                       | MD               | Retina Consultants of Houston, PA | HOUSTON, TX US                           | Investigator                                            |                                                                                            |
| Tien P.                           | Wong       |                       | MD               | Retina Consultants of Houston, PA | HOUSTON, TX US                           | Investigator                                            |                                                                                            |
| Sadia Y                           | Karani     |                       |                  | Retina Consultants of Houston, PA | HOUSTON, TX US                           | Coordinator                                             |                                                                                            |
| Stacy M.                          | Supapo     |                       |                  | Retina Consultants of Houston, PA | HOUSTON, TX US                           | Coordinator                                             |                                                                                            |
| Nubia                             | Landaverde |                       |                  | Retina Consultants of Houston, PA | HOUSTON, TX US                           | Coordinator                                             |                                                                                            |
| Maura A                           | Estes      |                       |                  | Retina Consultants of Houston, PA | HOUSTON, TX US                           | Coordinator                                             |                                                                                            |
| Meredith                          | Berry      |                       |                  | Retina Consultants of Houston, PA | HOUSTON, TX US                           | Coordinator                                             |                                                                                            |
| Kimberly                          | Williamson |                       |                  | Retina Consultants of Houston, PA | HOUSTON, TX US                           | Coordinator                                             |                                                                                            |
| Leslie K.                         | Kao        |                       |                  | Retina Consultants of Houston, PA | HOUSTON, TX US                           | Coordinator                                             |                                                                                            |
| Garret L                          | Twining    |                       |                  | Retina Consultants of Houston, PA | HOUSTON, TX US                           | Coordinator                                             |                                                                                            |
| Diana                             | Rodriguez  |                       |                  | Retina Consultants of Houston, PA | HOUSTON, TX US                           | Coordinator                                             |                                                                                            |
| Daniel                            | Park       |                       |                  | Retina Consultants of Houston, PA | HOUSTON, TX US                           | Coordinator                                             |                                                                                            |
| Ashley E.                         | Chancey    |                       |                  | Retina Consultants of Houston, PA | HOUSTON, TX US                           | Coordinator                                             |                                                                                            |
| Amy                               | Hutson     |                       |                  | Retina Consultants of Houston, PA | HOUSTON, TX US                           | Coordinator                                             |                                                                                            |

Supplemental Online Content: Nonauthor Collaborators

\*Indicates required information. Only first name, last name, and suffix will appear in PubMed.

| *First Name and Middle Initial(s) | *Last Name     | *Suffix (eg, Jr, III) | Academic Degrees | Institution                       | Location (city, state/province, country) | Role or Contribution, eg, chair, principal investigator | Group (if more than 1 Group listed in the byline) and/or Subgroup (eg, Steering Committee) |
|-----------------------------------|----------------|-----------------------|------------------|-----------------------------------|------------------------------------------|---------------------------------------------------------|--------------------------------------------------------------------------------------------|
| Bylinda                           | Vo-Le          |                       |                  | Retina Consultants of Houston, PA | HOUSTON, TX US                           | Coordinator                                             |                                                                                            |
| Cassie                            | Cone           |                       |                  | Retina Consultants of Houston, PA | HOUSTON, TX US                           | Coordinator                                             |                                                                                            |
| Heather                           | Koger-Grifaldo |                       |                  | Retina Consultants of Houston, PA | HOUSTON, TX US                           | VA Tester                                               |                                                                                            |
| Belinda A.                        | Almanza        |                       |                  | Retina Consultants of Houston, PA | HOUSTON, TX US                           | VA Tester                                               |                                                                                            |
| Brenda                            | Dives          |                       |                  | Retina Consultants of Houston, PA | HOUSTON, TX US                           | VA Tester                                               |                                                                                            |
| Melina                            | Vela           |                       |                  | Retina Consultants of Houston, PA | HOUSTON, TX US                           | VA Tester                                               |                                                                                            |
| Elizabeth                         | Quellar        |                       |                  | Retina Consultants of Houston, PA | HOUSTON, TX US                           | VA Tester                                               |                                                                                            |
| Rebecca                           | Yee            |                       |                  | Retina Consultants of Houston, PA | HOUSTON, TX US                           | VA Tester                                               |                                                                                            |
| Veronica A.                       | Sneed          |                       |                  | Retina Consultants of Houston, PA | HOUSTON, TX US                           | VA Tester                                               |                                                                                            |
| Tressa                            | Royse          |                       |                  | Retina Consultants of Houston, PA | HOUSTON, TX US                           | VA Tester                                               |                                                                                            |
| Tamara L                          | Dodel          |                       |                  | Retina Consultants of Houston, PA | HOUSTON, TX US                           | Photographer                                            |                                                                                            |
| Miranda F                         | James          |                       |                  | Retina Consultants of Houston, PA | HOUSTON, TX US                           | Photographer                                            |                                                                                            |
| Beau A                            | Richter        |                       |                  | Retina Consultants of Houston, PA | HOUSTON, TX US                           | Photographer                                            |                                                                                            |
| Eric N.                           | Kegley         |                       |                  | Retina Consultants of Houston, PA | HOUSTON, TX US                           | Photographer                                            |                                                                                            |
| Luis R.                           | Salinas        |                       |                  | Retina Consultants of Houston, PA | HOUSTON, TX US                           | Photographer                                            |                                                                                            |

Supplemental Online Content: Nonauthor Collaborators

\*Indicates required information. Only first name, last name, and suffix will appear in PubMed.

| *First Name and Middle Initial(s) | *Last Name | *Suffix (eg, Jr, III) | Academic Degrees | Institution                                                    | Location (city, state/province, country) | Role or Contribution, eg, chair, principal investigator | Group (if more than 1 Group listed in the byline) and/or Subgroup (eg, Steering Committee) |
|-----------------------------------|------------|-----------------------|------------------|----------------------------------------------------------------|------------------------------------------|---------------------------------------------------------|--------------------------------------------------------------------------------------------|
| Cary A.                           | Stoever    |                       |                  | Retina Consultants of Houston, PA                              | HOUSTON, TX US                           | Photographer                                            |                                                                                            |
| Joseph T.                         | Fan        |                       | MD               | Loma Linda University Health Care, Department of Ophthalmology | Loma Linda, CA US                        | Investigator                                            |                                                                                            |
| Michael E.                        | Rauser     |                       | MD               | Loma Linda University Health Care, Department of Ophthalmology | Loma Linda, CA US                        | Investigator                                            |                                                                                            |
| Mukesh Bhogilal                   | Suthar     |                       | MD               | Loma Linda University Health Care, Department of Ophthalmology | Loma Linda, CA US                        | Investigator                                            |                                                                                            |
| Raquel                            | Hernandez  |                       |                  | Loma Linda University Health Care, Department of Ophthalmology | Loma Linda, CA US                        | Coordinator                                             |                                                                                            |
| Travis D                          | Davison    |                       | BS               | Loma Linda University Health Care, Department of Ophthalmology | Loma Linda, CA US                        | Coordinator                                             |                                                                                            |
| Jacqueline V                      | Midgett    |                       | MPH              | Loma Linda University Health Care, Department of Ophthalmology | Loma Linda, CA US                        | Coordinator                                             |                                                                                            |
| Kara E.                           | Halsey     |                       |                  | Loma Linda University Health Care, Department of Ophthalmology | Loma Linda, CA US                        | Coordinator                                             |                                                                                            |
| Liel Marvyn                       | Cerdenio   |                       | BS               | Loma Linda University Health Care, Department of Ophthalmology | Loma Linda, CA US                        | Coordinator                                             |                                                                                            |
| Gisela                            | Santiago   |                       |                  | Loma Linda University Health Care, Department of Ophthalmology | Loma Linda, CA US                        | Coordinator                                             |                                                                                            |

## Supplemental Online Content: Nonauthor Collaborators

\*Indicates required information. Only first name, last name, and suffix will appear in PubMed.

| *First Name and Middle Initial(s) | *Last Name | *Suffix (eg, Jr, III) | Academic Degrees | Institution                                                    | Location (city, state/province, country) | Role or Contribution, eg, chair, principal investigator | Group (if more than 1 Group listed in the byline) and/or Subgroup (eg, Steering Committee) |
|-----------------------------------|------------|-----------------------|------------------|----------------------------------------------------------------|------------------------------------------|---------------------------------------------------------|--------------------------------------------------------------------------------------------|
| Anthoni                           | Tampubolon |                       |                  | Loma Linda University Health Care, Department of Ophthalmology | Loma Linda, CA US                        | Coordinator                                             |                                                                                            |
| Brandi J                          | Perez      |                       |                  | Loma Linda University Health Care, Department of Ophthalmology | Loma Linda, CA US                        | Coordinator                                             |                                                                                            |
| William H.                        | Kiernan    |                       | O.D.             | Loma Linda University Health Care, Department of Ophthalmology | Loma Linda, CA US                        | VA Tester                                               |                                                                                            |
| Marcia                            | Easterly   |                       |                  | Loma Linda University Health Care, Department of Ophthalmology | Loma Linda, CA US                        | Photographer                                            |                                                                                            |
| Armand                            | Assissini  |                       |                  | Loma Linda University Health Care, Department of Ophthalmology | Loma Linda, CA US                        | Photographer                                            |                                                                                            |
| Diana                             | Povero     |                       |                  | Loma Linda University Health Care, Department of Ophthalmology | Loma Linda, CA US                        | Photographer                                            |                                                                                            |
| Jesse                             | Knabb      |                       | COA              | Loma Linda University Health Care, Department of Ophthalmology | Loma Linda, CA US                        | Photographer                                            |                                                                                            |
| Moises                            | Tellez     |                       |                  | Loma Linda University Health Care, Department of Ophthalmology | Loma Linda, CA US                        | Photographer                                            |                                                                                            |
| Gregory M.                        | Haffner    |                       | MD               | New England Retina Associates, PC                              | Trumbull, CT US                          | Investigator                                            |                                                                                            |
| Nauman A.                         | Chaudhry   |                       | MD               | New England Retina Associates, PC                              | Trumbull, CT US                          | Investigator                                            |                                                                                            |
| Sumit P.                          | Shah       |                       | MD               | New England Retina Associates, PC                              | Trumbull, CT US                          | Investigator                                            |                                                                                            |



## Supplemental Online Content: Nonauthor Collaborators

\*Indicates required information. Only first name, last name, and suffix will appear in PubMed.

| *First Name and Middle Initial(s) | *Last Name | *Suffix (eg, Jr, III) | Academic Degrees | Institution                       | Location (city, state/province, country) | Role or Contribution, eg, chair, principal investigator | Group (if more than 1 Group listed in the byline) and/or Subgroup (eg, Steering Committee) |
|-----------------------------------|------------|-----------------------|------------------|-----------------------------------|------------------------------------------|---------------------------------------------------------|--------------------------------------------------------------------------------------------|
| Leslie D                          | Hurst      |                       | MS               | New England Retina Associates, PC | Trumbull, CT US                          | Coordinator                                             |                                                                                            |
| Jennifer M.                       | Matteson   |                       |                  | New England Retina Associates, PC | Trumbull, CT US                          | Coordinator                                             |                                                                                            |
| JoAnna L.                         | Pelletier  |                       |                  | New England Retina Associates, PC | Trumbull, CT US                          | Coordinator                                             |                                                                                            |
| Laura A.                          | Fox        |                       |                  | New England Retina Associates, PC | Trumbull, CT US                          | Coordinator                                             |                                                                                            |
| Shannan                           | Moreau     |                       |                  | New England Retina Associates, PC | Trumbull, CT US                          | Coordinator                                             |                                                                                            |
| Emiliya                           | German     |                       |                  | New England Retina Associates, PC | Trumbull, CT US                          | Coordinator                                             |                                                                                            |
| Adriana N                         | Enxuto     |                       |                  | New England Retina Associates, PC | Trumbull, CT US                          | VA Tester                                               |                                                                                            |
| Alison                            | Fontecchio |                       |                  | New England Retina Associates, PC | Trumbull, CT US                          | VA Tester                                               |                                                                                            |
| Heather                           | Casey      |                       |                  | New England Retina Associates, PC | Trumbull, CT US                          | VA Tester                                               |                                                                                            |
| Stephanie                         | Esteves    |                       |                  | New England Retina Associates, PC | Trumbull, CT US                          | VA Tester                                               |                                                                                            |
| Kristin E.                        | Brown      |                       |                  | New England Retina Associates, PC | Trumbull, CT US                          | VA Tester                                               |                                                                                            |
| Kristen G.                        | Tommaselli |                       |                  | New England Retina Associates, PC | Trumbull, CT US                          | VA Tester                                               |                                                                                            |
| Michelle                          | Esler      |                       |                  | New England Retina Associates, PC | Trumbull, CT US                          | VA Tester                                               |                                                                                            |
| Marie Grace                       | Laglivia   |                       |                  | New England Retina Associates, PC | Trumbull, CT US                          | Photographer                                            |                                                                                            |
| Marissa L.                        | Scherf     |                       |                  | New England Retina Associates, PC | Trumbull, CT US                          | Photographer                                            |                                                                                            |

## Supplemental Online Content: Nonauthor Collaborators

\*Indicates required information. Only first name, last name, and suffix will appear in PubMed.

| *First Name and Middle Initial(s) | *Last Name | *Suffix (eg, Jr, III) | Academic Degrees | Institution                          | Location (city, state/province, country) | Role or Contribution, eg, chair, principal investigator | Group (if more than 1 Group listed in the byline) and/or Subgroup (eg, Steering Committee) |
|-----------------------------------|------------|-----------------------|------------------|--------------------------------------|------------------------------------------|---------------------------------------------------------|--------------------------------------------------------------------------------------------|
| Stefanie R                        | DeSantis   |                       |                  | New England Retina Associates, PC    | Trumbull, CT US                          | Photographer                                            |                                                                                            |
| Justin A.                         | Cocilo     |                       |                  | New England Retina Associates, PC    | Trumbull, CT US                          | Photographer                                            |                                                                                            |
| Greg                              | McNamara   |                       |                  | New England Retina Associates, PC    | Trumbull, CT US                          | Photographer                                            |                                                                                            |
| Angela                            | LaPre      |                       |                  | New England Retina Associates, PC    | Trumbull, CT US                          | Photographer                                            |                                                                                            |
| Emily                             | Morse      |                       | BS               | New England Retina Associates, PC    | Trumbull, CT US                          | Photographer                                            |                                                                                            |
| Andreas K.                        | Lauer      |                       | MD               | Casey Eye Institute                  | Portland, OR US                          | Investigator                                            |                                                                                            |
| Christina J                       | Flaxel     |                       | MD               | Casey Eye Institute                  | Portland, OR US                          | Investigator                                            |                                                                                            |
| Steven T.                         | Bailey     |                       | MD               | Casey Eye Institute                  | Portland, OR US                          | Investigator                                            |                                                                                            |
| Ann D.                            | Lundquist  |                       | BA               | Casey Eye Institute                  | Portland, OR US                          | Coordinator                                             |                                                                                            |
| Shelley A.                        | Hanel      |                       | BS               | Casey Eye Institute                  | Portland, OR US                          | Coordinator                                             |                                                                                            |
| Mitchell                          | Schain     |                       | BS               | Casey Eye Institute                  | Portland, OR US                          | Coordinator                                             |                                                                                            |
| Jennifer K                        | Maykoski   |                       | BS               | Casey Eye Institute                  | Portland, OR US                          | VA Tester                                               |                                                                                            |
| Shirley D.                        | Ira        |                       | COT              | Casey Eye Institute                  | Portland, OR US                          | VA Tester                                               |                                                                                            |
| Susan K.                          | Nolte      |                       |                  | Casey Eye Institute                  | Portland, OR US                          | VA Tester                                               |                                                                                            |
| Scott R.                          | Pickell    |                       | BS               | Casey Eye Institute                  | Portland, OR US                          | Photographer                                            |                                                                                            |
| Michelle                          | Brix       |                       |                  | Casey Eye Institute                  | Portland, OR US                          | Photographer                                            |                                                                                            |
| Peter N.                          | Steinkamp  |                       | MS               | Casey Eye Institute                  | Portland, OR US                          | Photographer                                            |                                                                                            |
| Chris S                           | Howell     |                       | BA               | Casey Eye Institute                  | Portland, OR US                          | Photographer                                            |                                                                                            |
| Chiedozie                         | Ukachukwu  |                       |                  | Casey Eye Institute                  | Portland, OR US                          | Photographer                                            |                                                                                            |
| Dawn M.                           | Ryan       |                       | CRA              | Casey Eye Institute                  | Portland, OR US                          | Photographer                                            |                                                                                            |
| Jordan                            | Barth      |                       | AA               | Casey Eye Institute                  | Portland, OR US                          | Photographer                                            |                                                                                            |
| Jocelyn T.                        | Hui        |                       | BS               | Casey Eye Institute                  | Portland, OR US                          | Photographer                                            |                                                                                            |
| Michael A.                        | Novak      |                       | MD               | Retina Associates of Cleveland, Inc. | Beachwood, OH US                         | Investigator                                            |                                                                                            |
| Llewelyn J.                       | Rao        |                       | MD               | Retina Associates of Cleveland, Inc. | Beachwood, OH US                         | Investigator                                            |                                                                                            |

Supplemental Online Content: Nonauthor Collaborators

\*Indicates required information. Only first name, last name, and suffix will appear in PubMed.

| *First Name and Middle Initial(s) | *Last Name | *Suffix (eg, Jr, III) | Academic Degrees | Institution                          | Location (city, state/province, country) | Role or Contribution, eg, chair, principal investigator | Group (if more than 1 Group listed in the byline) and/or Subgroup (eg, Steering Committee) |
|-----------------------------------|------------|-----------------------|------------------|--------------------------------------|------------------------------------------|---------------------------------------------------------|--------------------------------------------------------------------------------------------|
| Lawrence J.                       | Singerman  |                       | MD               | Retina Associates of Cleveland, Inc. | Beachwood, OH US                         | Investigator                                            |                                                                                            |
| Jerome P.                         | Schartman  |                       | MD               | Retina Associates of Cleveland, Inc. | Beachwood, OH US                         | Investigator                                            |                                                                                            |
| David G.                          | Miller     |                       | MD               | Retina Associates of Cleveland, Inc. | Beachwood, OH US                         | Investigator                                            |                                                                                            |
| Joseph M.                         | Coney      |                       | MD               | Retina Associates of Cleveland, Inc. | Beachwood, OH US                         | Investigator                                            |                                                                                            |
| Susan C.                          | Rath       |                       | PA, CCRC         | Retina Associates of Cleveland, Inc. | Beachwood, OH US                         | Coordinator                                             |                                                                                            |
| Lorraine                          | Stone      |                       | RN, BA, CCRC     | Retina Associates of Cleveland, Inc. | Beachwood, OH US                         | Coordinator                                             |                                                                                            |
| Veronica A.                       | Smith      |                       | RN               | Retina Associates of Cleveland, Inc. | Beachwood, OH US                         | Coordinator                                             |                                                                                            |
| Janine                            | Davis      |                       | RN               | Retina Associates of Cleveland, Inc. | Beachwood, OH US                         | Coordinator                                             |                                                                                            |
| John                              | Lacombe    |                       |                  | Retina Associates of Cleveland, Inc. | Beachwood, OH US                         | Coordinator                                             |                                                                                            |
| Cecelia                           | Rykena     |                       | ABO-NCLE         | Retina Associates of Cleveland, Inc. | Beachwood, OH US                         | VA Tester                                               |                                                                                            |
| Vivian                            | Tanner     |                       | COT              | Retina Associates of Cleveland, Inc. | Beachwood, OH US                         | VA Tester                                               |                                                                                            |
| Kimberly A.                       | DuBois     |                       | LPN, CCRP        | Retina Associates of Cleveland, Inc. | Beachwood, OH US                         | VA Tester                                               |                                                                                            |
| Kim                               | Drury      |                       | RN               | Retina Associates of Cleveland, Inc. | Beachwood, OH US                         | VA Tester                                               |                                                                                            |
| Mary A                            | Ilc        |                       | COT              | Retina Associates of Cleveland, Inc. | Beachwood, OH US                         | VA Tester                                               |                                                                                            |
| Tia R                             | Drugan     |                       | COA              | Retina Associates of Cleveland, Inc. | Beachwood, OH US                         | VA Tester                                               |                                                                                            |

## Supplemental Online Content: Nonauthor Collaborators

\*Indicates required information. Only first name, last name, and suffix will appear in PubMed.

| *First Name and Middle Initial(s) | *Last Name | *Suffix (eg, Jr, III) | Academic Degrees | Institution                            | Location (city, state/province, country) | Role or Contribution, eg, chair, principal investigator | Group (if more than 1 Group listed in the byline) and/or Subgroup (eg, Steering Committee) |
|-----------------------------------|------------|-----------------------|------------------|----------------------------------------|------------------------------------------|---------------------------------------------------------|--------------------------------------------------------------------------------------------|
| Trina M.                          | Nitzsche   |                       |                  | Retina Associates of Cleveland, Inc.   | Beachwood, OH US                         | Photographer                                            |                                                                                            |
| Elizabeth                         | McNamara   |                       | COA              | Retina Associates of Cleveland, Inc.   | Beachwood, OH US                         | Photographer                                            |                                                                                            |
| Gregg A.                          | Greanoff   |                       | COA, CRA         | Retina Associates of Cleveland, Inc.   | Beachwood, OH US                         | Photographer                                            |                                                                                            |
| John C.                           | DuBois     |                       | CRA              | Retina Associates of Cleveland, Inc.   | Beachwood, OH US                         | Photographer                                            |                                                                                            |
| A. Thomas                         | Ghuman     |                       | MD               | National Ophthalmic Research Institute | Fort Myers, FL US                        | Investigator                                            |                                                                                            |
| Ashish G.                         | Sharma     |                       | MD               | National Ophthalmic Research Institute | Fort Myers, FL US                        | Investigator                                            |                                                                                            |
| Glenn                             | Wing       |                       | MD               | National Ophthalmic Research Institute | Fort Myers, FL US                        | Investigator                                            |                                                                                            |
| Paul A.                           | Raskauskas |                       | MD               | National Ophthalmic Research Institute | Fort Myers, FL US                        | Investigator                                            |                                                                                            |
| Eileen                            | Knips      |                       | RN, COA, CRA     | National Ophthalmic Research Institute | Fort Myers, FL US                        | Coordinator                                             |                                                                                            |
| Laura                             | Greenhoe   |                       | BA               | National Ophthalmic Research Institute | Fort Myers, FL US                        | Coordinator                                             |                                                                                            |
| Natalie N.                        | Torres     |                       |                  | National Ophthalmic Research Institute | Fort Myers, FL US                        | Coordinator                                             |                                                                                            |
| Cheryl                            | Kiesel     |                       | C.O.A., R.O.U.B. | National Ophthalmic Research Institute | Fort Myers, FL US                        | Coordinator                                             |                                                                                            |
| Crystal Y.                        | Peters     |                       | CCRC             | National Ophthalmic Research Institute | Fort Myers, FL US                        | Coordinator                                             |                                                                                            |
| Cheryl                            | Ryan       |                       |                  | National Ophthalmic Research Institute | Fort Myers, FL US                        | Coordinator                                             |                                                                                            |
| Rebecca J                         | Youngblood |                       |                  | National Ophthalmic Research Institute | Fort Myers, FL US                        | Coordinator                                             |                                                                                            |

Supplemental Online Content: Nonauthor Collaborators

\*Indicates required information. Only first name, last name, and suffix will appear in PubMed.

| *First Name and Middle Initial(s) | *Last Name  | *Suffix (eg, Jr, III) | Academic Degrees | Institution                            | Location (city, state/province, country) | Role or Contribution, eg, chair, principal investigator | Group (if more than 1 Group listed in the byline) and/or Subgroup (eg, Steering Committee) |
|-----------------------------------|-------------|-----------------------|------------------|----------------------------------------|------------------------------------------|---------------------------------------------------------|--------------------------------------------------------------------------------------------|
| Danielle                          | Dyshanowitz |                       |                  | National Ophthalmic Research Institute | Fort Myers, FL US                        | VA Tester                                               |                                                                                            |
| Anita H.                          | Leslie      |                       |                  | National Ophthalmic Research Institute | Fort Myers, FL US                        | VA Tester                                               |                                                                                            |
| Etienne C.                        | Schoeman    |                       |                  | National Ophthalmic Research Institute | Fort Myers, FL US                        | Photographer                                            |                                                                                            |
| Raymond K.                        | Kiesel      |                       |                  | National Ophthalmic Research Institute | Fort Myers, FL US                        | Photographer                                            |                                                                                            |
| Michael R.                        | Pavlica     |                       | MD               | Family Eye Group                       | Lancaster, PA US                         | Investigator                                            |                                                                                            |
| Alexandra C                       | Teale       |                       |                  | Family Eye Group                       | Lancaster, PA US                         | Coordinator                                             |                                                                                            |
| Noelle S                          | Matta       |                       | COT              | Family Eye Group                       | Lancaster, PA US                         | Coordinator                                             |                                                                                            |
| Cristina M.                       | Brubaker    |                       | COA              | Family Eye Group                       | Lancaster, PA US                         | Photographer                                            |                                                                                            |
| Christine M.                      | Keefer      |                       |                  | Family Eye Group                       | Lancaster, PA US                         | Photographer                                            |                                                                                            |
| Alyson B.                         | Keene       |                       |                  | Family Eye Group                       | Lancaster, PA US                         | Photographer                                            |                                                                                            |
| Chander N.                        | Samy        |                       | MD               | Ocala Eye Retina Consultants           | Ocala, FL US                             | Investigator                                            |                                                                                            |
| Robert J.                         | Kraut       |                       | MD               | Ocala Eye Retina Consultants           | Ocala, FL US                             | Investigator                                            |                                                                                            |
| Tammy L                           | Conder      |                       | BS, COA          | Ocala Eye Retina Consultants           | Ocala, FL US                             | Coordinator                                             |                                                                                            |
| Kathy                             | Shirley     |                       | COT              | Ocala Eye Retina Consultants           | Ocala, FL US                             | Coordinator                                             |                                                                                            |
| Linsey                            | Corso       |                       | COA              | Ocala Eye Retina Consultants           | Ocala, FL US                             | Coordinator                                             |                                                                                            |
| Karen                             | Ely         |                       | COA              | Ocala Eye Retina Consultants           | Ocala, FL US                             | VA Tester                                               |                                                                                            |
| Arlene                            | Egan        |                       |                  | Ocala Eye Retina Consultants           | Ocala, FL US                             | Photographer                                            |                                                                                            |
| Elizabeth                         | Scala       |                       | COA              | Ocala Eye Retina Consultants           | Ocala, FL US                             | Photographer                                            |                                                                                            |
| Vanessa                           | Alava       |                       |                  | Ocala Eye Retina Consultants           | Ocala, FL US                             | Photographer                                            |                                                                                            |
| Stacey                            | Chiguina    |                       |                  | Ocala Eye Retina Consultants           | Ocala, FL US                             | Photographer                                            |                                                                                            |
| Stewart                           | Gross       |                       |                  | Ocala Eye Retina Consultants           | Ocala, FL US                             | Photographer                                            |                                                                                            |
| Paul G.                           | Arrigg      |                       | MD               | Joslin Diabetes Center                 | Boston, MA US                            | Investigator                                            |                                                                                            |
| Paolo S.                          | Silva       |                       | MD               | Joslin Diabetes Center                 | Boston, MA US                            | Investigator                                            |                                                                                            |
| Lloyd Paul                        | Aiello      |                       | MD, PhD          | Joslin Diabetes Center                 | Boston, MA US                            | Investigator                                            |                                                                                            |
| Timothy J.                        | Murtha      |                       | MD               | Joslin Diabetes Center                 | Boston, MA US                            | Investigator                                            |                                                                                            |
| George S.                         | Sharuk      |                       | MD               | Joslin Diabetes Center                 | Boston, MA US                            | Investigator                                            |                                                                                            |
| Hanna                             | Kwak        |                       |                  | Joslin Diabetes Center                 | Boston, MA US                            | Coordinator                                             |                                                                                            |

Supplemental Online Content: Nonauthor Collaborators

\*Indicates required information. Only first name, last name, and suffix will appear in PubMed.

| *First Name and Middle Initial(s) | *Last Name         | *Suffix (eg, Jr, III) | Academic Degrees | Institution                  | Location (city, state/province, country) | Role or Contribution, eg, chair, principal investigator | Group (if more than 1 Group listed in the byline) and/or Subgroup (eg, Steering Committee) |
|-----------------------------------|--------------------|-----------------------|------------------|------------------------------|------------------------------------------|---------------------------------------------------------|--------------------------------------------------------------------------------------------|
| Margaret E.                       | Stockman           |                       |                  | Joslin Diabetes Center       | Boston, MA US                            | Coordinator                                             |                                                                                            |
| Leila                             | Bestourous         |                       |                  | Joslin Diabetes Center       | Boston, MA US                            | VA Tester                                               |                                                                                            |
| Michael N.                        | Krigman            |                       |                  | Joslin Diabetes Center       | Boston, MA US                            | VA Tester                                               |                                                                                            |
| Rita K.                           | Kirby              |                       |                  | Joslin Diabetes Center       | Boston, MA US                            | VA Tester                                               |                                                                                            |
| Steve L.                          | Papaconstantinou   |                       | COT              | Joslin Diabetes Center       | Boston, MA US                            | VA Tester                                               |                                                                                            |
| Jerry D.                          | Cavallerano        |                       | OD, PhD          | Joslin Diabetes Center       | Boston, MA US                            | VA Tester                                               |                                                                                            |
| Elizabeth S.                      | Weimann            |                       | COT, BS          | Joslin Diabetes Center       | Boston, MA US                            | VA Tester                                               |                                                                                            |
| Robert W.                         | Cavicchi           |                       |                  | Joslin Diabetes Center       | Boston, MA US                            | Photographer                                            |                                                                                            |
| Hugo                              | Quiroz-Mercado     |                       | MD               | Denver Health Medical Center | Denver, CO US                            | Investigator                                            |                                                                                            |
| Leif S.                           | Ryman              |                       |                  | Denver Health Medical Center | Denver, CO US                            | Coordinator                                             |                                                                                            |
| Daniela                           | Santos Canto       |                       | MD               | Denver Health Medical Center | Denver, CO US                            | Coordinator                                             |                                                                                            |
| Guillermo                         | Salcedo-Villanueva |                       | MD               | Denver Health Medical Center | Denver, CO US                            | Coordinator                                             |                                                                                            |
| Teresa E.                         | Rudesyle           |                       |                  | Denver Health Medical Center | Denver, CO US                            | Coordinator                                             |                                                                                            |
| Chelsea Lynn                      | Mastin             |                       |                  | Denver Health Medical Center | Denver, CO US                            | VA Tester                                               |                                                                                            |
| Rosemary C.                       | Rhodes             |                       | COT              | Denver Health Medical Center | Denver, CO US                            | VA Tester                                               |                                                                                            |
| Regina                            | Victoria           |                       | COT              | Denver Health Medical Center | Denver, CO US                            | Photographer                                            |                                                                                            |
| Carolyn J.                        | Jackson            |                       | COT              | Denver Health Medical Center | Denver, CO US                            | Photographer                                            |                                                                                            |
| Raj K.                            | Maturi             |                       | MD               | Raj K. Maturi, M.D., P.C.    | Indianapolis, IN US                      | Investigator                                            |                                                                                            |
| Ashley M.                         | Harless            |                       |                  | Raj K. Maturi, M.D., P.C.    | Indianapolis, IN US                      | Coordinator                                             |                                                                                            |
| Laura A.                          | Bleau              |                       | LPN, CRC         | Raj K. Maturi, M.D., P.C.    | Indianapolis, IN US                      | Coordinator                                             |                                                                                            |
| Carolee K.                        | Novak              |                       | CRC              | Raj K. Maturi, M.D., P.C.    | Indianapolis, IN US                      | VA Tester                                               |                                                                                            |
| Alisha                            | Ware               |                       |                  | Raj K. Maturi, M.D., P.C.    | Indianapolis, IN US                      | Photographer                                            |                                                                                            |
| Thomas                            | Steele             |                       | CRA              | Raj K. Maturi, M.D., P.C.    | Indianapolis, IN US                      | Photographer                                            |                                                                                            |
| Lorraine                          | White              |                       |                  | Raj K. Maturi, M.D., P.C.    | Indianapolis, IN US                      | Photographer                                            |                                                                                            |
| Missy                             | Livengood          |                       |                  | Raj K. Maturi, M.D., P.C.    | Indianapolis, IN US                      | Photographer                                            |                                                                                            |
| Nicole                            | Ellingwood         |                       |                  | Raj K. Maturi, M.D., P.C.    | Indianapolis, IN US                      | Photographer                                            |                                                                                            |
| Abby                              | Maple              |                       |                  | Raj K. Maturi, M.D., P.C.    | Indianapolis, IN US                      | Photographer                                            |                                                                                            |
| Charlotte                         | Harris             |                       |                  | Raj K. Maturi, M.D., P.C.    | Indianapolis, IN US                      | Photographer                                            |                                                                                            |

Supplemental Online Content: Nonauthor Collaborators

\*Indicates required information. Only first name, last name, and suffix will appear in PubMed.

| *First Name and Middle Initial(s) | *Last Name | *Suffix (eg, Jr, III) | Academic Degrees | Institution                          | Location (city, state/province, country) | Role or Contribution, eg, chair, principal investigator | Group (if more than 1 Group listed in the byline) and/or Subgroup (eg, Steering Committee) |
|-----------------------------------|------------|-----------------------|------------------|--------------------------------------|------------------------------------------|---------------------------------------------------------|--------------------------------------------------------------------------------------------|
| Joseph M.                         | Googe      | Jr.                   | MD               | Southeastern Retina Associates, P.C. | Knoxville, TN US                         | Investigator                                            |                                                                                            |
| Nicholas G.                       | Anderson   |                       | MD               | Southeastern Retina Associates, P.C. | Knoxville, TN US                         | Investigator                                            |                                                                                            |
| Stephen L.                        | Perkins    |                       | MD               | Southeastern Retina Associates, P.C. | Knoxville, TN US                         | Investigator                                            |                                                                                            |
| Kristina                          | Oliver     |                       |                  | Southeastern Retina Associates, P.C. | Knoxville, TN US                         | Coordinator                                             |                                                                                            |
| Julie                             | Asher      |                       |                  | Southeastern Retina Associates, P.C. | Knoxville, TN US                         | Coordinator                                             |                                                                                            |
| Steve                             | Morris     |                       |                  | Southeastern Retina Associates, P.C. | Knoxville, TN US                         | Coordinator                                             |                                                                                            |
| Lisa                              | Lovelady   |                       |                  | Southeastern Retina Associates, P.C. | Knoxville, TN US                         | Coordinator                                             |                                                                                            |
| Nicole                            | Grindall   |                       | COA              | Southeastern Retina Associates, P.C. | Knoxville, TN US                         | VA Tester                                               |                                                                                            |
| Patricia                          | Coppola    |                       |                  | Southeastern Retina Associates, P.C. | Knoxville, TN US                         | VA Tester                                               |                                                                                            |
| Kathy L.                          | Schulz     |                       | COT              | Southeastern Retina Associates, P.C. | Knoxville, TN US                         | VA Tester                                               |                                                                                            |
| Jennifer                          | Beerbower  |                       | COA              | Southeastern Retina Associates, P.C. | Knoxville, TN US                         | VA Tester                                               |                                                                                            |
| Ann                               | Arnold     |                       | COT              | Southeastern Retina Associates, P.C. | Knoxville, TN US                         | VA Tester                                               |                                                                                            |
| Christy                           | Berry      |                       |                  | Southeastern Retina Associates, P.C. | Knoxville, TN US                         | VA Tester                                               |                                                                                            |
| Cecile                            | Hunt       |                       |                  | Southeastern Retina Associates, P.C. | Knoxville, TN US                         | VA Tester                                               |                                                                                            |
| Erika A                           | Oelrich    |                       |                  | Southeastern Retina Associates, P.C. | Knoxville, TN US                         | Photographer                                            |                                                                                            |

Supplemental Online Content: Nonauthor Collaborators

\*Indicates required information. Only first name, last name, and suffix will appear in PubMed.

| *First Name and Middle Initial(s) | *Last Name  | *Suffix (eg, Jr, III) | Academic Degrees | Institution                          | Location (city, state/province, country) | Role or Contribution, eg, chair, principal investigator | Group (if more than 1 Group listed in the byline) and/or Subgroup (eg, Steering Committee) |
|-----------------------------------|-------------|-----------------------|------------------|--------------------------------------|------------------------------------------|---------------------------------------------------------|--------------------------------------------------------------------------------------------|
| Jerry K.                          | Whetstone   |                       |                  | Southeastern Retina Associates, P.C. | Knoxville, TN US                         | Photographer                                            |                                                                                            |
| Justin                            | Walsh       |                       |                  | Southeastern Retina Associates, P.C. | Knoxville, TN US                         | Photographer                                            |                                                                                            |
| Raul E.                           | Lince       |                       |                  | Southeastern Retina Associates, P.C. | Knoxville, TN US                         | Photographer                                            |                                                                                            |
| Sarah M.                          | Oelrich     |                       |                  | Southeastern Retina Associates, P.C. | Knoxville, TN US                         | Photographer                                            |                                                                                            |
| Judy E.                           | Kim         |                       | MD               | Medical College of Wisconsin         | Milwaukee, WI US                         | Investigator                                            |                                                                                            |
| Dennis P.                         | Han         |                       | MD               | Medical College of Wisconsin         | Milwaukee, WI US                         | Investigator                                            |                                                                                            |
| David V.                          | Weinberg    |                       | M.D.             | Medical College of Wisconsin         | Milwaukee, WI US                         | Investigator                                            |                                                                                            |
| Thomas B.                         | Connor      | Jr.                   | M.D.             | Medical College of Wisconsin         | Milwaukee, WI US                         | Investigator                                            |                                                                                            |
| William J.                        | Wirostko    |                       | M.D.             | Medical College of Wisconsin         | Milwaukee, WI US                         | Investigator                                            |                                                                                            |
| Vesper V.                         | Williams    |                       |                  | Medical College of Wisconsin         | Milwaukee, WI US                         | Coordinator                                             |                                                                                            |
| Tracy L.                          | Kaczanowski |                       | MS, CCRC         | Medical College of Wisconsin         | Milwaukee, WI US                         | Coordinator                                             |                                                                                            |
| Krissa L.                         | Packard     |                       |                  | Medical College of Wisconsin         | Milwaukee, WI US                         | Coordinator                                             |                                                                                            |
| Vicki                             | Barwick     |                       | BS               | Medical College of Wisconsin         | Milwaukee, WI US                         | VA Tester                                               |                                                                                            |
| Judy                              | Flanders    |                       | BS               | Medical College of Wisconsin         | Milwaukee, WI US                         | VA Tester                                               |                                                                                            |
| Pat A.                            | Winter      |                       |                  | Medical College of Wisconsin         | Milwaukee, WI US                         | VA Tester                                               |                                                                                            |
| Stephanie J                       | Moebius     |                       |                  | Medical College of Wisconsin         | Milwaukee, WI US                         | Photographer                                            |                                                                                            |
| Kathy J.                          | Selchert    |                       | COT              | Medical College of Wisconsin         | Milwaukee, WI US                         | Photographer                                            |                                                                                            |
| Marriner L.                       | Altmann     |                       | CRA, CPT, OCT-C  | Medical College of Wisconsin         | Milwaukee, WI US                         | Photographer                                            |                                                                                            |
| Mara                              | Goldberg    |                       |                  | Medical College of Wisconsin         | Milwaukee, WI US                         | Photographer                                            |                                                                                            |
| Hannah                            | Sheppard    |                       |                  | Medical College of Wisconsin         | Milwaukee, WI US                         | Photographer                                            |                                                                                            |
| Joseph R.                         | Beringer    |                       |                  | Medical College of Wisconsin         | Milwaukee, WI US                         | Photographer                                            |                                                                                            |
| Brittany                          | Rego        |                       |                  | Medical College of Wisconsin         | Milwaukee, WI US                         | Photographer                                            |                                                                                            |
| Dennis B.                         | Backes      |                       |                  | Medical College of Wisconsin         | Milwaukee, WI US                         | Photographer                                            |                                                                                            |



## Supplemental Online Content: Nonauthor Collaborators

\*Indicates required information. Only first name, last name, and suffix will appear in PubMed.

| *First Name and Middle Initial(s) | *Last Name  | *Suffix (eg, Jr, III) | Academic Degrees | Institution                                      | Location (city, state/province, country) | Role or Contribution, eg, chair, principal investigator | Group (if more than 1 Group listed in the byline) and/or Subgroup (eg, Steering Committee) |
|-----------------------------------|-------------|-----------------------|------------------|--------------------------------------------------|------------------------------------------|---------------------------------------------------------|--------------------------------------------------------------------------------------------|
| Michael A.                        | Singer      |                       | MD               | Medical Center Ophthalmology Associates          | San Antonio, TX US                       | Investigator                                            |                                                                                            |
| Darren J.                         | Bell        |                       | MD               | Medical Center Ophthalmology Associates          | San Antonio, TX US                       | Investigator                                            |                                                                                            |
| Catherine                         | Ellis       |                       | BS               | Medical Center Ophthalmology Associates          | San Antonio, TX US                       | Coordinator                                             |                                                                                            |
| Beatrice A.                       | Guajardo    |                       |                  | Medical Center Ophthalmology Associates          | San Antonio, TX US                       | Coordinator                                             |                                                                                            |
| Judy                              | Rittimann   |                       | COT              | Medical Center Ophthalmology Associates          | San Antonio, TX US                       | Coordinator                                             |                                                                                            |
| Tamara M.                         | Urias       |                       | LVN              | Medical Center Ophthalmology Associates          | San Antonio, TX US                       | Coordinator                                             |                                                                                            |
| Felicia                           | Huron       |                       |                  | Medical Center Ophthalmology Associates          | San Antonio, TX US                       | Photographer                                            |                                                                                            |
| Ann-Marie                         | Mora        |                       | OD               | Medical Center Ophthalmology Associates          | San Antonio, TX US                       | VA Tester                                               |                                                                                            |
| Roxanne                           | Gomez       |                       |                  | Medical Center Ophthalmology Associates          | San Antonio, TX US                       | VA Tester                                               |                                                                                            |
| Celia Maria                       | Pena        |                       |                  | Medical Center Ophthalmology Associates          | San Antonio, TX US                       | Photographer                                            |                                                                                            |
| Vincent                           | Segovia     |                       |                  | Medical Center Ophthalmology Associates          | San Antonio, TX US                       | Photographer                                            |                                                                                            |
| Rosa                              | Escobar     |                       |                  | Medical Center Ophthalmology Associates          | San Antonio, TX US                       | Photographer                                            |                                                                                            |
| G. Robert                         | Hampton     |                       | MD               | Retina-Vitreous Surgeons of Central New York, PC | Syracuse, NY US                          | Investigator                                            |                                                                                            |
| Jamin S.                          | Brown       |                       | MD               | Retina-Vitreous Surgeons of Central New York, PC | Syracuse, NY US                          | Investigator                                            |                                                                                            |
| Laurie J.                         | Sienkiewicz |                       |                  | Retina-Vitreous Surgeons of Central New York, PC | Syracuse, NY US                          | Coordinator                                             |                                                                                            |

## Supplemental Online Content: Nonauthor Collaborators

\*Indicates required information. Only first name, last name, and suffix will appear in PubMed.

| *First Name and Middle Initial(s) | *Last Name  | *Suffix (eg, Jr, III) | Academic Degrees | Institution                                      | Location (city, state/province, country) | Role or Contribution, eg, chair, principal investigator | Group (if more than 1 Group listed in the byline) and/or Subgroup (eg, Steering Committee) |
|-----------------------------------|-------------|-----------------------|------------------|--------------------------------------------------|------------------------------------------|---------------------------------------------------------|--------------------------------------------------------------------------------------------|
| Victoria L.                       | Gabris      |                       | RN               | Retina-Vitreous Surgeons of Central New York, PC | Syracuse, NY US                          | Coordinator                                             |                                                                                            |
| Cindy J.                          | Grinnell    |                       | RN               | Retina-Vitreous Surgeons of Central New York, PC | Syracuse, NY US                          | Coordinator                                             |                                                                                            |
| Lynn M.                           | Kwasniewski |                       |                  | Retina-Vitreous Surgeons of Central New York, PC | Syracuse, NY US                          | VA Tester                                               |                                                                                            |
| Michelle L.                       | Manley      |                       |                  | Retina-Vitreous Surgeons of Central New York, PC | Syracuse, NY US                          | VA Tester                                               |                                                                                            |
| Brandi M                          | Bellows     |                       |                  | Retina-Vitreous Surgeons of Central New York, PC | Syracuse, NY US                          | VA Tester                                               |                                                                                            |
| Nicole E.                         | Robarge     |                       |                  | Retina-Vitreous Surgeons of Central New York, PC | Syracuse, NY US                          | Photographer                                            |                                                                                            |
| Peter B.                          | Hay         |                       |                  | Retina-Vitreous Surgeons of Central New York, PC | Syracuse, NY US                          | Photographer                                            |                                                                                            |
| Stefanie R.                       | DeSantis    |                       | BS               | Retina-Vitreous Surgeons of Central New York, PC | Syracuse, NY US                          | Photographer                                            |                                                                                            |
| Teresa M.                         | DeForge     |                       |                  | Retina-Vitreous Surgeons of Central New York, PC | Syracuse, NY US                          | Photographer                                            |                                                                                            |
| Kyle J.                           | Alliman     |                       | MD               | Wolfe Eye Clinic                                 | WEST DES MOINES, IA US                   | Investigator                                            |                                                                                            |
| Jared S.                          | Nielsen     |                       | MD               | Wolfe Eye Clinic                                 | WEST DES MOINES, IA US                   | Investigator                                            |                                                                                            |
| Tami Jo                           | Woehl       |                       |                  | Wolfe Eye Clinic                                 | WEST DES MOINES, IA US                   | Coordinator                                             |                                                                                            |
| Marianne                          | Parker      |                       |                  | Wolfe Eye Clinic                                 | WEST DES MOINES, IA US                   | Coordinator                                             |                                                                                            |
| Bethany                           | George      |                       | RN               | Wolfe Eye Clinic                                 | WEST DES MOINES, IA US                   | Coordinator                                             |                                                                                            |
| Holly                             | Keenan      |                       |                  | Wolfe Eye Clinic                                 | WEST DES MOINES, IA US                   | VA Tester                                               |                                                                                            |

Supplemental Online Content: Nonauthor Collaborators

\*Indicates required information. Only first name, last name, and suffix will appear in PubMed.

| *First Name and Middle Initial(s) | *Last Name   | *Suffix (eg, Jr, III) | Academic Degrees | Institution                    | Location (city, state/province, country) | Role or Contribution, eg, chair, principal investigator | Group (if more than 1 Group listed in the byline) and/or Subgroup (eg, Steering Committee) |
|-----------------------------------|--------------|-----------------------|------------------|--------------------------------|------------------------------------------|---------------------------------------------------------|--------------------------------------------------------------------------------------------|
| Jack                              | Bowers       |                       |                  | Wolfe Eye Clinic               | WEST DES MOINES, IA US                   | VA Tester                                               |                                                                                            |
| Jennifer L.                       | Coleman      |                       |                  | Wolfe Eye Clinic               | WEST DES MOINES, IA US                   | VA Tester                                               |                                                                                            |
| Jamie                             | Spillman     |                       |                  | Wolfe Eye Clinic               | WEST DES MOINES, IA US                   | VA Tester                                               |                                                                                            |
| Marilyn A.                        | Johnson      |                       |                  | Wolfe Eye Clinic               | WEST DES MOINES, IA US                   | VA Tester                                               |                                                                                            |
| Spencer D                         | Ridgway      |                       |                  | Wolfe Eye Clinic               | WEST DES MOINES, IA US                   | Photographer                                            |                                                                                            |
| Jodi                              | Weier        |                       |                  | Wolfe Eye Clinic               | WEST DES MOINES, IA US                   | Photographer                                            |                                                                                            |
| Lisa M.                           | Boender      |                       |                  | Wolfe Eye Clinic               | WEST DES MOINES, IA US                   | Photographer                                            |                                                                                            |
| Jay                               | Rostvold     |                       |                  | Wolfe Eye Clinic               | WEST DES MOINES, IA US                   | Photographer                                            |                                                                                            |
| Bailey R.                         | Bennett      |                       |                  | Wolfe Eye Clinic               | WEST DES MOINES, IA US                   | Photographer                                            |                                                                                            |
| Robert W.                         | Wong         |                       | MD               | Austin Retina Associates       | AUSTIN, TX US                            | Investigator                                            |                                                                                            |
| Shelley                           | Day          |                       | MD               | Austin Retina Associates       | AUSTIN, TX US                            | Investigator                                            |                                                                                            |
| Peter A.                          | Nixon        |                       | MD               | Austin Retina Associates       | AUSTIN, TX US                            | Investigator                                            |                                                                                            |
| Margaret A.                       | Rodriguez    |                       | COA              | Austin Retina Associates       | AUSTIN, TX US                            | Coordinator                                             |                                                                                            |
| Phillip V.                        | Le           |                       |                  | Austin Retina Associates       | AUSTIN, TX US                            | Coordinator                                             |                                                                                            |
| Carrie E.                         | Leung        |                       |                  | Austin Retina Associates       | AUSTIN, TX US                            | Coordinator                                             |                                                                                            |
| Chris A.                          | Montesclaros |                       |                  | Austin Retina Associates       | AUSTIN, TX US                            | Coordinator                                             |                                                                                            |
| Cory                              | Mangham      |                       |                  | Austin Retina Associates       | AUSTIN, TX US                            | Photographer                                            |                                                                                            |
| Mary                              | Laremont     |                       |                  | Austin Retina Associates       | AUSTIN, TX US                            | Photographer                                            |                                                                                            |
| Codey L.                          | Daus         |                       |                  | Austin Retina Associates       | AUSTIN, TX US                            | Photographer                                            |                                                                                            |
| Thomas M.                         | Aaberg       | Jr.                   | MD               | Retina Specialists of Michigan | GRAND RAPIDS, MI US                      | Investigator                                            |                                                                                            |
| Scott J.                          | Westhouse    |                       | DO               | Retina Specialists of Michigan | GRAND RAPIDS, MI US                      | Investigator                                            |                                                                                            |
| Holly L.                          | Vincent      |                       | COA              | Retina Specialists of Michigan | GRAND RAPIDS, MI US                      | Coordinator                                             |                                                                                            |

## Supplemental Online Content: Nonauthor Collaborators

\*Indicates required information. Only first name, last name, and suffix will appear in PubMed.

| *First Name and Middle Initial(s) | *Last Name | *Suffix (eg, Jr, III) | Academic Degrees   | Institution                                                                                          | Location (city, state/province, country) | Role or Contribution, eg, chair, principal investigator | Group (if more than 1 Group listed in the byline) and/or Subgroup (eg, Steering Committee) |
|-----------------------------------|------------|-----------------------|--------------------|------------------------------------------------------------------------------------------------------|------------------------------------------|---------------------------------------------------------|--------------------------------------------------------------------------------------------|
| Rebecca                           | Malone     |                       | COA, OSC           | Retina Specialists of Michigan                                                                       | GRAND RAPIDS, MI US                      | VA Tester                                               |                                                                                            |
| Shymaa                            | Mohamed    |                       |                    | Retina Specialists of Michigan                                                                       | GRAND RAPIDS, MI US                      | Photographer                                            |                                                                                            |
| Casey                             | Le Roy     |                       |                    | Retina Specialists of Michigan                                                                       | GRAND RAPIDS, MI US                      | Photographer                                            |                                                                                            |
| Kathy L.                          | Karsten    |                       | COT                | Retina Specialists of Michigan                                                                       | GRAND RAPIDS, MI US                      | Photographer                                            |                                                                                            |
| Kristine L.                       | VanDerKooi |                       | BA, COA            | Retina Specialists of Michigan                                                                       | GRAND RAPIDS, MI US                      | Photographer                                            |                                                                                            |
| Olivia P                          | Rainey     |                       | BFA                | Retina Specialists of Michigan                                                                       | GRAND RAPIDS, MI US                      | Photographer                                            |                                                                                            |
| Sandeep                           | Grover     |                       | MD                 | University of Florida College of Med., Department of Ophthalmology, Jacksonville Health Science Cent | Jacksonville, FL US                      | Investigator                                            |                                                                                            |
| Shamim A.                         | Haji       |                       | MD                 | University of Florida College of Med., Department of Ophthalmology, Jacksonville Health Science Cent | Jacksonville, FL US                      | Investigator                                            |                                                                                            |
| Kakarla V.                        | Chalam     |                       | MD, PhD, MBA, FACS | University of Florida College of Med., Department of Ophthalmology, Jacksonville Health Science Cent | Jacksonville, FL US                      | Investigator                                            |                                                                                            |
| Ghulam Shabbir                    | Hamdani    |                       | MBBS, MSH, CCRP    | University of Florida College of Med., Department of Ophthalmology, Jacksonville Health Science Cent | Jacksonville, FL US                      | Coordinator                                             |                                                                                            |
| Kumar                             | Sambhav    |                       | MD                 | University of Florida College of Med., Department of Ophthalmology, Jacksonville Health Science Cent | Jacksonville, FL US                      | Coordinator                                             |                                                                                            |
| Wenhua                            | Li         |                       | MD                 | University of Florida College of Med., Department of Ophthalmology, Jacksonville Health Science Cent | Jacksonville, FL US                      | Coordinator                                             |                                                                                            |

## Supplemental Online Content: Nonauthor Collaborators

\*Indicates required information. Only first name, last name, and suffix will appear in PubMed.

| *First Name and Middle Initial(s) | *Last Name  | *Suffix (eg, Jr, III) | Academic Degrees | Institution                                                                                          | Location (city, state/province, country) | Role or Contribution, eg, chair, principal investigator | Group (if more than 1 Group listed in the byline) and/or Subgroup (eg, Steering Committee) |
|-----------------------------------|-------------|-----------------------|------------------|------------------------------------------------------------------------------------------------------|------------------------------------------|---------------------------------------------------------|--------------------------------------------------------------------------------------------|
| Ashley                            | Cowart      |                       | OD               | University of Florida College of Med., Department of Ophthalmology, Jacksonville Health Science Cent | Jacksonville, FL US                      | Coordinator                                             |                                                                                            |
| Bharani Krishna                   | Mynampati A |                       | PhD              | University of Florida College of Med., Department of Ophthalmology, Jacksonville Health Science Cent | Jacksonville, FL US                      | Coordinator                                             |                                                                                            |
| Cheryl L                          | White       |                       |                  | University of Florida College of Med., Department of Ophthalmology, Jacksonville Health Science Cent | Jacksonville, FL US                      | Coordinator                                             |                                                                                            |
| Jazzmin N                         | Smith       |                       |                  | University of Florida College of Med., Department of Ophthalmology, Jacksonville Health Science Cent | Jacksonville, FL US                      | Coordinator                                             |                                                                                            |
| Nicholas                          | Freeman     |                       |                  | University of Florida College of Med., Department of Ophthalmology, Jacksonville Health Science Cent | Jacksonville, FL US                      | Photographer                                            |                                                                                            |
| Jose J.                           | Carrion     |                       |                  | University of Florida College of Med., Department of Ophthalmology, Jacksonville Health Science Cent | Jacksonville, FL US                      | Photographer                                            |                                                                                            |
| Nauman A.                         | Chaudhry    |                       | MD               | Retina Group of New England                                                                          | NEW LONDON, CT US                        | Investigator                                            |                                                                                            |
| Emiliya                           | German      |                       |                  | Retina Group of New England                                                                          | NEW LONDON, CT US                        | Coordinator                                             |                                                                                            |
| Heather                           | Casey       |                       |                  | Retina Group of New England                                                                          | NEW LONDON, CT US                        | VA Tester                                               |                                                                                            |
| Alison                            | Fontecchio  |                       |                  | Retina Group of New England                                                                          | NEW LONDON, CT US                        | VA Tester                                               |                                                                                            |
| Justin A.                         | Cocilo      |                       |                  | Retina Group of New England                                                                          | NEW LONDON, CT US                        | Photographer                                            |                                                                                            |
| Brett T.                          | Foxman      |                       | MD               | Retinal and Ophthalmic Consultants, PC                                                               | Northfield, NJ US                        | Investigator                                            |                                                                                            |

Supplemental Online Content: Nonauthor Collaborators

\*Indicates required information. Only first name, last name, and suffix will appear in PubMed.

| *First Name and Middle Initial(s) | *Last Name | *Suffix (eg, Jr, III) | Academic Degrees | Institution                                     | Location (city, state/province, country) | Role or Contribution, eg, chair, principal investigator | Group (if more than 1 Group listed in the byline) and/or Subgroup (eg, Steering Committee) |
|-----------------------------------|------------|-----------------------|------------------|-------------------------------------------------|------------------------------------------|---------------------------------------------------------|--------------------------------------------------------------------------------------------|
| Scott G.                          | Foxman     |                       | MD               | Retinal and Ophthalmic Consultants, PC          | Northfield, NJ US                        | Investigator                                            |                                                                                            |
| Natalie S.                        | Mahan      |                       | COA, CRC         | Retinal and Ophthalmic Consultants, PC          | Northfield, NJ US                        | Coordinator                                             |                                                                                            |
| Chastity                          | Mendez     |                       |                  | Retinal and Ophthalmic Consultants, PC          | Northfield, NJ US                        | Coordinator                                             |                                                                                            |
| Alexander J.                      | Brucker    |                       | MD               | University of Pennsylvania Scheie Eye Institute | Philadelphia, PA US                      | Investigator                                            |                                                                                            |
| Benjamin J.                       | Kim        |                       | MD               | University of Pennsylvania Scheie Eye Institute | Philadelphia, PA US                      | Investigator                                            |                                                                                            |
| Sheri                             | Drossner   |                       | MSW              | University of Pennsylvania Scheie Eye Institute | Philadelphia, PA US                      | Coordinator                                             |                                                                                            |
| Joan C.                           | DuPont     |                       | CRC              | University of Pennsylvania Scheie Eye Institute | Philadelphia, PA US                      | Coordinator                                             |                                                                                            |
| Judy                              | Chen       |                       |                  | University of Pennsylvania Scheie Eye Institute | Philadelphia, PA US                      | Photographer                                            |                                                                                            |
| Tyrone                            | Quarterman |                       |                  | University of Pennsylvania Scheie Eye Institute | Philadelphia, PA US                      | VA Tester                                               |                                                                                            |
| Armin                             | Farazdaghi |                       |                  | University of Pennsylvania Scheie Eye Institute | Philadelphia, PA US                      | VA Tester                                               |                                                                                            |
| William                           | Nyberg     |                       |                  | University of Pennsylvania Scheie Eye Institute | Philadelphia, PA US                      | Photographer                                            |                                                                                            |
| Sara                              | Morales    |                       |                  | University of Pennsylvania Scheie Eye Institute | Philadelphia, PA US                      | Photographer                                            |                                                                                            |
| Laurel                            | Weeney     |                       |                  | University of Pennsylvania Scheie Eye Institute | Philadelphia, PA US                      | Photographer                                            |                                                                                            |
| Michael                           | Bodine     |                       |                  | University of Pennsylvania Scheie Eye Institute | Philadelphia, PA US                      | Photographer                                            |                                                                                            |
| Beth                              | Serpentine |                       | BS               | University of Pennsylvania Scheie Eye Institute | Philadelphia, PA US                      | Photographer                                            |                                                                                            |

## Supplemental Online Content: Nonauthor Collaborators

\*Indicates required information. Only first name, last name, and suffix will appear in PubMed.

| *First Name and Middle Initial(s) | *Last Name | *Suffix (eg, Jr, III) | Academic Degrees | Institution                                     | Location (city, state/province, country) | Role or Contribution, eg, chair, principal investigator | Group (if more than 1 Group listed in the byline) and/or Subgroup (eg, Steering Committee) |
|-----------------------------------|------------|-----------------------|------------------|-------------------------------------------------|------------------------------------------|---------------------------------------------------------|--------------------------------------------------------------------------------------------|
| Cheryl                            | Devine     |                       |                  | University of Pennsylvania Scheie Eye Institute | Philadelphia, PA US                      | Photographer                                            |                                                                                            |
| Jim M.                            | Berger     |                       |                  | University of Pennsylvania Scheie Eye Institute | Philadelphia, PA US                      | Photographer                                            |                                                                                            |
| David Allen                       | DiLoreto   | Jr.                   | MD, PhD          | University of Rochester                         | ROCHESTER, NY US                         | Investigator                                            |                                                                                            |
| George W.                         | O'Gara     |                       | MBA, CCRC        | University of Rochester                         | ROCHESTER, NY US                         | Coordinator                                             |                                                                                            |
| Kari M.                           | Steinmetz  |                       | BA, COA          | University of Rochester                         | ROCHESTER, NY US                         | Coordinator                                             |                                                                                            |
| Andrea M.                         | Czubinski  |                       |                  | University of Rochester                         | ROCHESTER, NY US                         | Coordinator                                             |                                                                                            |
| Gary                              | Gagarinas  |                       | COMT, CCRA       | University of Rochester                         | ROCHESTER, NY US                         | VA Tester                                               |                                                                                            |
| Melissa S                         | Keim       |                       |                  | University of Rochester                         | ROCHESTER, NY US                         | VA Tester                                               |                                                                                            |
| Rachel M                          | Aleese     |                       | BS, COT          | University of Rochester                         | ROCHESTER, NY US                         | VA Tester                                               |                                                                                            |
| Dan A                             | Castillo   |                       |                  | University of Rochester                         | ROCHESTER, NY US                         | VA Tester                                               |                                                                                            |
| Yvonne F                          | Yu         |                       |                  | University of Rochester                         | ROCHESTER, NY US                         | VA Tester                                               |                                                                                            |
| Rebecca K.                        | Gerhart    |                       | BS               | University of Rochester                         | ROCHESTER, NY US                         | VA Tester                                               |                                                                                            |
| Salina M.                         | Tongue     |                       | AAS, COA         | University of Rochester                         | ROCHESTER, NY US                         | VA Tester                                               |                                                                                            |
| TKe                               | Long       |                       |                  | University of Rochester                         | ROCHESTER, NY US                         | Photographer                                            |                                                                                            |
| Taylor A.                         | Pannell    |                       | BS               | University of Rochester                         | ROCHESTER, NY US                         | Photographer                                            |                                                                                            |
| Steven                            | DeRidder   |                       |                  | University of Rochester                         | ROCHESTER, NY US                         | Photographer                                            |                                                                                            |
| Rachel                            | Hollar     |                       |                  | University of Rochester                         | ROCHESTER, NY US                         | Photographer                                            |                                                                                            |
| Patricia A.                       | Artman     |                       | BS               | University of Rochester                         | ROCHESTER, NY US                         | Photographer                                            |                                                                                            |
| Lynn                              | Singer     |                       |                  | University of Rochester                         | ROCHESTER, NY US                         | Photographer                                            |                                                                                            |
| Laura                             | Guzman     |                       |                  | University of Rochester                         | ROCHESTER, NY US                         | Photographer                                            |                                                                                            |
| Kassandra J                       | Mundt      |                       | BA               | University of Rochester                         | ROCHESTER, NY US                         | Photographer                                            |                                                                                            |
| Brittany A                        | Bateman    |                       | BS               | University of Rochester                         | ROCHESTER, NY US                         | Photographer                                            |                                                                                            |
| Brandi N                          | Deats      |                       |                  | University of Rochester                         | ROCHESTER, NY US                         | Photographer                                            |                                                                                            |
| Brittany S.                       | Richardson |                       | BS               | University of Rochester                         | ROCHESTER, NY US                         | Photographer                                            |                                                                                            |
| James L.                          | Kinyoun    |                       | MD               | University of Washington Medical Center         | Seattle, WA US                           | Investigator                                            |                                                                                            |

Supplemental Online Content: Nonauthor Collaborators

\*Indicates required information. Only first name, last name, and suffix will appear in PubMed.

| *First Name and Middle Initial(s) | *Last Name  | *Suffix (eg, Jr, III) | Academic Degrees   | Institution                             | Location (city, state/province, country) | Role or Contribution, eg, chair, principal investigator | Group (if more than 1 Group listed in the byline) and/or Subgroup (eg, Steering Committee) |
|-----------------------------------|-------------|-----------------------|--------------------|-----------------------------------------|------------------------------------------|---------------------------------------------------------|--------------------------------------------------------------------------------------------|
| Gurunadh Atmaram                  | Vemulakonda |                       | MD                 | University of Washington Medical Center | Seattle, WA US                           | Investigator                                            |                                                                                            |
| Ian P                             | Luttrell    |                       |                    | University of Washington Medical Center | Seattle, WA US                           | Coordinator                                             |                                                                                            |
| Patricia K.                       | Ernst       |                       | BA, COA            | University of Washington Medical Center | Seattle, WA US                           | Coordinator                                             |                                                                                            |
| Susan A.                          | Rath        |                       |                    | University of Washington Medical Center | Seattle, WA US                           | Coordinator                                             |                                                                                            |
| Francy                            | Moses       |                       |                    | University of Washington Medical Center | Seattle, WA US                           | VA Tester                                               |                                                                                            |
| Juli A.                           | Pettingill  |                       |                    | University of Washington Medical Center | Seattle, WA US                           | VA Tester                                               |                                                                                            |
| Ronald C.                         | Jones       |                       |                    | University of Washington Medical Center | Seattle, WA US                           | Photographer                                            |                                                                                            |
| James D.                          | Leslie      |                       | B.F.A.             | University of Washington Medical Center | Seattle, WA US                           | Photographer                                            |                                                                                            |
| Brad C.                           | Clifton     |                       |                    | University of Washington Medical Center | Seattle, WA US                           | Photographer                                            |                                                                                            |
| Robert S.                         | Wirthlin    |                       | MD                 | Spokane Eye Clinic                      | Spokane, WA US                           | Investigator                                            |                                                                                            |
| Eric S.                           | Guglielmo   |                       | MD                 | Spokane Eye Clinic                      | Spokane, WA US                           | Investigator                                            |                                                                                            |
| Eileen A.                         | Dittman     |                       | CCRC, RN           | Spokane Eye Clinic                      | Spokane, WA US                           | Coordinator                                             |                                                                                            |
| Jillian N                         | Erstad      |                       |                    | Spokane Eye Clinic                      | Spokane, WA US                           | Coordinator                                             |                                                                                            |
| Dylan C.                          | Waidelich   |                       | COA                | Spokane Eye Clinic                      | Spokane, WA US                           | Coordinator                                             |                                                                                            |
| Brian G                           | Skea        |                       |                    | Spokane Eye Clinic                      | Spokane, WA US                           | Coordinator                                             |                                                                                            |
| Cristofer J.                      | Garza       |                       | NCLE-AC, ABOC, COA | Spokane Eye Clinic                      | Spokane, WA US                           | Photographer                                            |                                                                                            |
| Christina                         | Owens       |                       | COT                | Spokane Eye Clinic                      | Spokane, WA US                           | VA Tester                                               |                                                                                            |
| Lori L.                           | Atwood      |                       |                    | Spokane Eye Clinic                      | Spokane, WA US                           | VA Tester                                               |                                                                                            |
| Ashley Nicole                     | Oakes       |                       | COA                | Spokane Eye Clinic                      | Spokane, WA US                           | Photographer                                            |                                                                                            |



## Supplemental Online Content: Nonauthor Collaborators

\*Indicates required information. Only first name, last name, and suffix will appear in PubMed.

| *First Name and Middle Initial(s) | *Last Name        | *Suffix (eg, Jr, III) | Academic Degrees | Institution                        | Location (city, state/province, country) | Role or Contribution, eg, chair, principal investigator | Group (if more than 1 Group listed in the byline) and/or Subgroup (eg, Steering Committee) |
|-----------------------------------|-------------------|-----------------------|------------------|------------------------------------|------------------------------------------|---------------------------------------------------------|--------------------------------------------------------------------------------------------|
| Adeline M.                        | Stone             |                       | COT              | Spokane Eye Clinic                 | Spokane, WA US                           | Photographer                                            |                                                                                            |
| Vicki M.                          | Stanton           |                       | COT              | Spokane Eye Clinic                 | Spokane, WA US                           | Photographer                                            |                                                                                            |
| Stewart A.                        | Daniels           |                       | MD               | Bay Area Retina Associates         | Walnut Creek, CA US                      | Investigator                                            |                                                                                            |
| Tushar M.                         | Ranchod           |                       | MD               | Bay Area Retina Associates         | Walnut Creek, CA US                      | Investigator                                            |                                                                                            |
| Craig J.                          | Leong             |                       | MD               | Bay Area Retina Associates         | Walnut Creek, CA US                      | Investigator                                            |                                                                                            |
| Nicole T                          | Pham              |                       | BS               | Bay Area Retina Associates         | Walnut Creek, CA US                      | Coordinator                                             |                                                                                            |
| Shannon R.                        | Earl              |                       |                  | Bay Area Retina Associates         | Walnut Creek, CA US                      | Coordinator                                             |                                                                                            |
| Stacey                            | Touson            |                       | BS               | Bay Area Retina Associates         | Walnut Creek, CA US                      | Coordinator                                             |                                                                                            |
| Melissa C                         | Bartlett          |                       | AAS              | Bay Area Retina Associates         | Walnut Creek, CA US                      | VA Tester                                               |                                                                                            |
| Mariana                           | Castro            |                       |                  | Bay Area Retina Associates         | Walnut Creek, CA US                      | VA Tester                                               |                                                                                            |
| Jessica                           | Garcia            |                       |                  | Bay Area Retina Associates         | Walnut Creek, CA US                      | VA Tester                                               |                                                                                            |
| Kayla                             | Gustavson         |                       |                  | Bay Area Retina Associates         | Walnut Creek, CA US                      | VA Tester                                               |                                                                                            |
| Christine                         | Fernando          |                       |                  | Bay Area Retina Associates         | Walnut Creek, CA US                      | VA Tester                                               |                                                                                            |
| Betty                             | Hom               |                       |                  | Bay Area Retina Associates         | Walnut Creek, CA US                      | Photographer                                            |                                                                                            |
| Cathy                             | Walker            |                       |                  | Bay Area Retina Associates         | Walnut Creek, CA US                      | Photographer                                            |                                                                                            |
| Fred                              | Hanamoto          |                       |                  | Bay Area Retina Associates         | Walnut Creek, CA US                      | Photographer                                            |                                                                                            |
| Grace M.                          | Marudo            |                       | AAS              | Bay Area Retina Associates         | Walnut Creek, CA US                      | Photographer                                            |                                                                                            |
| Leah M.                           | McNeil            |                       |                  | Bay Area Retina Associates         | Walnut Creek, CA US                      | Photographer                                            |                                                                                            |
| Jose Carlos                       | Suazo             |                       | AAS              | Bay Area Retina Associates         | Walnut Creek, CA US                      | Photographer                                            |                                                                                            |
| Matthew D.                        | Hughes            |                       | AAS              | Bay Area Retina Associates         | Walnut Creek, CA US                      | Photographer                                            |                                                                                            |
| Yesenia                           | Cerna             |                       |                  | Bay Area Retina Associates         | Walnut Creek, CA US                      | Photographer                                            |                                                                                            |
| Manvi P.                          | Maker             |                       | MD               | NorthShore University HealthSystem | Glenview, IL US                          | Investigator                                            |                                                                                            |
| Mira                              | Shiloach          |                       | MS               | NorthShore University HealthSystem | Glenview, IL US                          | Coordinator                                             |                                                                                            |
| Courtney                          | Kastler           |                       |                  | NorthShore University HealthSystem | Glenview, IL US                          | Photographer                                            |                                                                                            |
| Liza                              | Vierneza-Castillo |                       |                  | NorthShore University HealthSystem | Glenview, IL US                          | Photographer                                            |                                                                                            |
| Lynn                              | Wasilewski        |                       |                  | NorthShore University HealthSystem | Glenview, IL US                          | Photographer                                            |                                                                                            |

Supplemental Online Content: Nonauthor Collaborators

\*Indicates required information. Only first name, last name, and suffix will appear in PubMed.

| *First Name and Middle Initial(s) | *Last Name  | *Suffix (eg, Jr, III) | Academic Degrees | Institution                        | Location (city, state/province, country) | Role or Contribution, eg, chair, principal investigator | Group (if more than 1 Group listed in the byline) and/or Subgroup (eg, Steering Committee) |
|-----------------------------------|-------------|-----------------------|------------------|------------------------------------|------------------------------------------|---------------------------------------------------------|--------------------------------------------------------------------------------------------|
| Joseph A.                         | Khawly      |                       | MD               | Retina and Vitreous of Texas       | HOUSTON, TX US                           | Investigator                                            |                                                                                            |
| H. Michael                        | Lambert     |                       | MD               | Retina and Vitreous of Texas       | HOUSTON, TX US                           | Investigator                                            |                                                                                            |
| Diana                             | Abdelgani   |                       |                  | Retina and Vitreous of Texas       | HOUSTON, TX US                           | Coordinator                                             |                                                                                            |
| Pam S.                            | Miller      |                       |                  | Retina and Vitreous of Texas       | HOUSTON, TX US                           | Coordinator                                             |                                                                                            |
| Valerie N.                        | Lazarte     |                       |                  | Retina and Vitreous of Texas       | HOUSTON, TX US                           | VA Tester                                               |                                                                                            |
| Debbie                            | Fredrickson |                       |                  | Retina and Vitreous of Texas       | HOUSTON, TX US                           | VA Tester                                               |                                                                                            |
| Lorena R.                         | Martinez    |                       |                  | Retina and Vitreous of Texas       | HOUSTON, TX US                           | Photographer                                            |                                                                                            |
| Donald K.                         | Lowd        |                       |                  | Retina and Vitreous of Texas       | HOUSTON, TX US                           | Photographer                                            |                                                                                            |
| Desiree                           | Lopez       |                       |                  | Retina and Vitreous of Texas       | HOUSTON, TX US                           | Photographer                                            |                                                                                            |
| Jason E.                          | Muniz       |                       |                  | Retina and Vitreous of Texas       | HOUSTON, TX US                           | Photographer                                            |                                                                                            |
| Colin                             | Blank       |                       |                  | Retina and Vitreous of Texas       | HOUSTON, TX US                           | Photographer                                            |                                                                                            |
| Christina Y.                      | Weng        |                       | MD, MBA          | Baylor Eye Physicians and Surgeons | Houston, TX US                           | Investigator                                            |                                                                                            |
| Robert E.                         | Coffee      |                       | MD, MPH          | Baylor Eye Physicians and Surgeons | Houston, TX US                           | Investigator                                            |                                                                                            |
| Petros Euthymiou                  | Carvounis   |                       | M.D.             | Baylor Eye Physicians and Surgeons | Houston, TX US                           | Investigator                                            |                                                                                            |
| Annika S.                         | Joshi       |                       | COA, CCRC        | Baylor Eye Physicians and Surgeons | Houston, TX US                           | Coordinator                                             |                                                                                            |
| Pejman                            | Hemati      |                       |                  | Baylor Eye Physicians and Surgeons | Houston, TX US                           | Coordinator                                             |                                                                                            |
| Cindy J.                          | Dorenbach   |                       | COT              | Baylor Eye Physicians and Surgeons | Houston, TX US                           | Coordinator                                             |                                                                                            |
| Wendy                             | Blacutt     |                       | MD               | Baylor Eye Physicians and Surgeons | Houston, TX US                           | Coordinator                                             |                                                                                            |
| Karri                             | Schuetzle   |                       | AAS,COA, CCRP    | Baylor Eye Physicians and Surgeons | Houston, TX US                           | Coordinator                                             |                                                                                            |
| Margaret M.                       | Olfson      |                       | COA, CCRP        | Baylor Eye Physicians and Surgeons | Houston, TX US                           | Coordinator                                             |                                                                                            |
| April                             | Leger       |                       | COT              | Baylor Eye Physicians and Surgeons | Houston, TX US                           | VA Tester                                               |                                                                                            |

## Supplemental Online Content: Nonauthor Collaborators

\*Indicates required information. Only first name, last name, and suffix will appear in PubMed.

| *First Name and Middle Initial(s) | *Last Name | *Suffix (eg, Jr, III) | Academic Degrees | Institution                        | Location (city, state/province, country) | Role or Contribution, eg, chair, principal investigator | Group (if more than 1 Group listed in the byline) and/or Subgroup (eg, Steering Committee) |
|-----------------------------------|------------|-----------------------|------------------|------------------------------------|------------------------------------------|---------------------------------------------------------|--------------------------------------------------------------------------------------------|
| Dana B.                           | Barnett    |                       |                  | Baylor Eye Physicians and Surgeons | Houston, TX US                           | Photographer                                            |                                                                                            |
| Joseph F.                         | Morales    |                       |                  | Baylor Eye Physicians and Surgeons | Houston, TX US                           | Photographer                                            |                                                                                            |
| Karl R.                           | Olsen      |                       | MD               | Retina Vitreous Consultants        | Monroeville, PA US                       | Investigator                                            |                                                                                            |
| P. William                        | Conrad     |                       | MD, PhD          | Retina Vitreous Consultants        | Monroeville, PA US                       | Investigator                                            |                                                                                            |
| Pamela P.                         | Rath       |                       | MD               | Retina Vitreous Consultants        | Monroeville, PA US                       | Investigator                                            |                                                                                            |
| Robert L.                         | Bergren    |                       | MD               | Retina Vitreous Consultants        | Monroeville, PA US                       | Investigator                                            |                                                                                            |
| Judy C                            | Liu        |                       | MD               | Retina Vitreous Consultants        | Monroeville, PA US                       | Investigator                                            |                                                                                            |
| Bernard H.                        | Doft       |                       | MD               | Retina Vitreous Consultants        | Monroeville, PA US                       | Investigator                                            |                                                                                            |
| Lori A.                           | Merlotti   |                       |                  | Retina Vitreous Consultants        | Monroeville, PA US                       | Coordinator                                             |                                                                                            |
| Holly M.                          | Mechling   |                       |                  | Retina Vitreous Consultants        | Monroeville, PA US                       | Coordinator                                             |                                                                                            |
| Jennifer L.                       | Chamberlin |                       | BS               | Retina Vitreous Consultants        | Monroeville, PA US                       | Coordinator                                             |                                                                                            |
| Missy A.                          | Forish     |                       |                  | Retina Vitreous Consultants        | Monroeville, PA US                       | Coordinator                                             |                                                                                            |
| Mary E.                           | Kelly      |                       |                  | Retina Vitreous Consultants        | Monroeville, PA US                       | Coordinator                                             |                                                                                            |
| Kellianne                         | Marfisi    |                       |                  | Retina Vitreous Consultants        | Monroeville, PA US                       | VA Tester                                               |                                                                                            |
| Julie                             | Walter     |                       |                  | Retina Vitreous Consultants        | Monroeville, PA US                       | VA Tester                                               |                                                                                            |
| Christina M.                      | Schultz    |                       |                  | Retina Vitreous Consultants        | Monroeville, PA US                       | VA Tester                                               |                                                                                            |
| Grace A.                          | Rigoni     |                       |                  | Retina Vitreous Consultants        | Monroeville, PA US                       | VA Tester                                               |                                                                                            |
| Lois                              | Stepansky  |                       |                  | Retina Vitreous Consultants        | Monroeville, PA US                       | VA Tester                                               |                                                                                            |
| Kimberly A.                       | Yeckel     |                       |                  | Retina Vitreous Consultants        | Monroeville, PA US                       | VA Tester                                               |                                                                                            |
| Veronica L.                       | Bennett    |                       | COA              | Retina Vitreous Consultants        | Monroeville, PA US                       | VA Tester                                               |                                                                                            |
| Christina R.                      | Fulwylie   |                       |                  | Retina Vitreous Consultants        | Monroeville, PA US                       | VA Tester                                               |                                                                                            |
| Courtney L.                       | Foreman    |                       |                  | Retina Vitreous Consultants        | Monroeville, PA US                       | Photographer                                            |                                                                                            |
| Brandi L.                         | Sherbine   |                       |                  | Retina Vitreous Consultants        | Monroeville, PA US                       | Photographer                                            |                                                                                            |
| Amanda                            | Fec        |                       |                  | Retina Vitreous Consultants        | Monroeville, PA US                       | Photographer                                            |                                                                                            |
| Dawn                              | Diperna    |                       |                  | Retina Vitreous Consultants        | Monroeville, PA US                       | Photographer                                            |                                                                                            |
| David                             | Steinberg  |                       |                  | Retina Vitreous Consultants        | Monroeville, PA US                       | Photographer                                            |                                                                                            |
| Keith D                           | McBroom    |                       |                  | Retina Vitreous Consultants        | Monroeville, PA US                       | Photographer                                            |                                                                                            |
| Melvin                            | Chen       |                       | MD               | Sarasota Retina Institute          | Sarasota, FL US                          | Investigator                                            |                                                                                            |

Supplemental Online Content: Nonauthor Collaborators

\*Indicates required information. Only first name, last name, and suffix will appear in PubMed.

| *First Name and Middle Initial(s) | *Last Name | *Suffix (eg, Jr, III) | Academic Degrees | Institution                       | Location (city, state/province, country) | Role or Contribution, eg, chair, principal investigator | Group (if more than 1 Group listed in the byline) and/or Subgroup (eg, Steering Committee) |
|-----------------------------------|------------|-----------------------|------------------|-----------------------------------|------------------------------------------|---------------------------------------------------------|--------------------------------------------------------------------------------------------|
| Marc H.                           | Levy       |                       | MD, FACS         | Sarasota Retina Institute         | Sarasota, FL US                          | Investigator                                            |                                                                                            |
| Waldemar                          | Torres     |                       | MD               | Sarasota Retina Institute         | Sarasota, FL US                          | Investigator                                            |                                                                                            |
| Peggy A.                          | Jelemensky |                       |                  | Sarasota Retina Institute         | Sarasota, FL US                          | Coordinator                                             |                                                                                            |
| Tara L.                           | Raphael    |                       |                  | Sarasota Retina Institute         | Sarasota, FL US                          | VA Tester                                               |                                                                                            |
| Mark A.                           | Prybylski  |                       |                  | Sarasota Retina Institute         | Sarasota, FL US                          | VA Tester                                               |                                                                                            |
| Amanda S                          | Holland    |                       |                  | Sarasota Retina Institute         | Sarasota, FL US                          | VA Tester                                               |                                                                                            |
| Joann J.                          | Rich       |                       |                  | Sarasota Retina Institute         | Sarasota, FL US                          | VA Tester                                               |                                                                                            |
| Jim                               | Sherry     |                       |                  | Sarasota Retina Institute         | Sarasota, FL US                          | Photographer                                            |                                                                                            |
| Charlotte                         | Rodman     |                       |                  | Sarasota Retina Institute         | Sarasota, FL US                          | Photographer                                            |                                                                                            |
| Evelyn J.                         | Inlow      |                       |                  | Sarasota Retina Institute         | Sarasota, FL US                          | Photographer                                            |                                                                                            |
| Mark                              | Sneath     |                       | COA              | Sarasota Retina Institute         | Sarasota, FL US                          | Photographer                                            |                                                                                            |
| Ruth P.                           | Arroyo     |                       |                  | Sarasota Retina Institute         | Sarasota, FL US                          | Photographer                                            |                                                                                            |
| Rosa                              | Miller     |                       |                  | Sarasota Retina Institute         | Sarasota, FL US                          | Photographer                                            |                                                                                            |
| Ivan J.                           | Suner      |                       | MD               | Retina Associates of Florida, LLC | Tampa, FL US                             | Investigator                                            |                                                                                            |
| Mark E.                           | Hammer     |                       | MD               | Retina Associates of Florida, LLC | Tampa, FL US                             | Investigator                                            |                                                                                            |
| Marc C.                           | Peden      |                       | MD               | Retina Associates of Florida, LLC | Tampa, FL US                             | Investigator                                            |                                                                                            |
| Janet R.                          | Traynom    |                       | COT              | Retina Associates of Florida, LLC | Tampa, FL US                             | Coordinator                                             |                                                                                            |
| Rochelle                          | DenBoer    |                       | LPN              | Retina Associates of Florida, LLC | Tampa, FL US                             | Coordinator                                             |                                                                                            |
| Susan                             | Ramsey     |                       |                  | Retina Associates of Florida, LLC | Tampa, FL US                             | VA Tester                                               |                                                                                            |
| Heidi                             | Vargo      |                       | COT              | Retina Associates of Florida, LLC | Tampa, FL US                             | VA Tester                                               |                                                                                            |
| Anita Kim                         | Malzahn    |                       |                  | Retina Associates of Florida, LLC | Tampa, FL US                             | Photographer                                            |                                                                                            |

## Supplemental Online Content: Nonauthor Collaborators

\*Indicates required information. Only first name, last name, and suffix will appear in PubMed.

| *First Name and Middle Initial(s) | *Last Name | *Suffix (eg, Jr, III) | Academic Degrees | Institution                           | Location (city, state/province, country) | Role or Contribution, eg, chair, principal investigator | Group (if more than 1 Group listed in the byline) and/or Subgroup (eg, Steering Committee) |
|-----------------------------------|------------|-----------------------|------------------|---------------------------------------|------------------------------------------|---------------------------------------------------------|--------------------------------------------------------------------------------------------|
| Debra                             | Jeffres    |                       | RN               | Retina Associates of Florida, LLC     | Tampa, FL US                             | Photographer                                            |                                                                                            |
| Sharon D.                         | Solomon    |                       | MD               | Wilmer Eye Institute at Johns Hopkins | Baltimore, MD US                         | Investigator                                            |                                                                                            |
| Susan                             | Bressler   |                       | MD               | Wilmer Eye Institute at Johns Hopkins | Baltimore, MD US                         | Investigator                                            |                                                                                            |
| Lisa K.                           | Levin      |                       |                  | Wilmer Eye Institute at Johns Hopkins | Baltimore, MD US                         | Coordinator                                             |                                                                                            |
| Deborah                           | Donohue    |                       |                  | Wilmer Eye Institute at Johns Hopkins | Baltimore, MD US                         | Coordinator                                             |                                                                                            |
| Mary                              | Frey       |                       | BSc, CCRP        | Wilmer Eye Institute at Johns Hopkins | Baltimore, MD US                         | VA Tester                                               |                                                                                            |
| Rita L.                           | Denbow     |                       | MLA, COA         | Wilmer Eye Institute at Johns Hopkins | Baltimore, MD US                         | VA Tester                                               |                                                                                            |
| Keisha                            | Murray     |                       |                  | Wilmer Eye Institute at Johns Hopkins | Baltimore, MD US                         | VA Tester                                               |                                                                                            |
| Nick                              | Rhoton     |                       | AA               | Wilmer Eye Institute at Johns Hopkins | Baltimore, MD US                         | Photographer                                            |                                                                                            |
| Russ                              | Distle     |                       |                  | Wilmer Eye Institute at Johns Hopkins | Baltimore, MD US                         | Photographer                                            |                                                                                            |
| David                             | Emmert     |                       | BA               | Wilmer Eye Institute at Johns Hopkins | Baltimore, MD US                         | Photographer                                            |                                                                                            |
| Joe                               | Belz       |                       |                  | Wilmer Eye Institute at Johns Hopkins | Baltimore, MD US                         | Photographer                                            |                                                                                            |
| Janis                             | Graul      |                       |                  | Wilmer Eye Institute at Johns Hopkins | Baltimore, MD US                         | Photographer                                            |                                                                                            |
| Jacquelyn                         | McDonald   |                       |                  | Wilmer Eye Institute at Johns Hopkins | Baltimore, MD US                         | Photographer                                            |                                                                                            |
| Charles                           | Herring    |                       | CRA              | Wilmer Eye Institute at Johns Hopkins | Baltimore, MD US                         | Photographer                                            |                                                                                            |

## Supplemental Online Content: Nonauthor Collaborators

\*Indicates required information. Only first name, last name, and suffix will appear in PubMed.

| *First Name and Middle Initial(s) | *Last Name      | *Suffix (eg, Jr, III) | Academic Degrees | Institution                           | Location (city, state/province, country) | Role or Contribution, eg, chair, principal investigator | Group (if more than 1 Group listed in the byline) and/or Subgroup (eg, Steering Committee) |
|-----------------------------------|-----------------|-----------------------|------------------|---------------------------------------|------------------------------------------|---------------------------------------------------------|--------------------------------------------------------------------------------------------|
| Dennis                            | Cain            |                       | C.R.A.           | Wilmer Eye Institute at Johns Hopkins | Baltimore, MD US                         | Photographer                                            |                                                                                            |
| Umar Khalil                       | Mian            |                       | M.D.             | Montefiore Medical Center             | BRONX, NY US                             | Investigator                                            |                                                                                            |
| Ana Paula                         | Morales Allende |                       | BA               | Montefiore Medical Center             | BRONX, NY US                             | Coordinator                                             |                                                                                            |
| Evelyn                            | Koestenblatt    |                       |                  | Montefiore Medical Center             | BRONX, NY US                             | Coordinator                                             |                                                                                            |
| Louise V.                         | Wolf            |                       | PhD              | Montefiore Medical Center             | BRONX, NY US                             | Coordinator                                             |                                                                                            |
| Nicole                            | Bernstein       |                       | BA               | Montefiore Medical Center             | BRONX, NY US                             | Coordinator                                             |                                                                                            |
| Rebecca L.                        | Riemer          |                       | BS               | Montefiore Medical Center             | BRONX, NY US                             | Coordinator                                             |                                                                                            |
| Erica                             | Otoo            |                       | OD               | Montefiore Medical Center             | BRONX, NY US                             | VA Tester                                               |                                                                                            |
| Irina                             | Katkovskaya     |                       | OD               | Montefiore Medical Center             | BRONX, NY US                             | VA Tester                                               |                                                                                            |
| Christine                         | Kim             |                       | OD               | Montefiore Medical Center             | BRONX, NY US                             | VA Tester                                               |                                                                                            |
| Kenneth                           | Boyd            |                       |                  | Montefiore Medical Center             | BRONX, NY US                             | Photographer                                            |                                                                                            |
| Kevin A.                          | Ellerbe         |                       | COA              | Montefiore Medical Center             | BRONX, NY US                             | Photographer                                            |                                                                                            |
| Edward                            | Miranda         |                       |                  | Montefiore Medical Center             | BRONX, NY US                             | Photographer                                            |                                                                                            |
| Caroline                          | Costa           |                       | COA              | Montefiore Medical Center             | BRONX, NY US                             | Photographer                                            |                                                                                            |
| Amr                               | Dessouki        |                       | MD               | Retinal Diagnostic Center             | Campbell, CA US                          | Investigator                                            |                                                                                            |
| Joel M.                           | Barra           |                       | BSBM, CCRP       | Retinal Diagnostic Center             | Campbell, CA US                          | Coordinator                                             |                                                                                            |
| Jessenia                          | Perez           |                       |                  | Retinal Diagnostic Center             | Campbell, CA US                          | Coordinator                                             |                                                                                            |
| Rose                              | Monahan         |                       |                  | Retinal Diagnostic Center             | Campbell, CA US                          | Coordinator                                             |                                                                                            |
| Thanh T.                          | Nguyen          |                       |                  | Retinal Diagnostic Center             | Campbell, CA US                          | Coordinator                                             |                                                                                            |
| Kelly                             | To              |                       |                  | Retinal Diagnostic Center             | Campbell, CA US                          | VA Tester                                               |                                                                                            |
| Hienmy                            | Dang            |                       |                  | Retinal Diagnostic Center             | Campbell, CA US                          | VA Tester                                               |                                                                                            |
| Tim                               | Kelley          |                       |                  | Retinal Diagnostic Center             | Campbell, CA US                          | Photographer                                            |                                                                                            |
| Gary E.                           | Fish            |                       | MD               | Texas Retina Associates               | Dallas, TX US                            | Investigator                                            |                                                                                            |
| Sally                             | Arceneaux       |                       |                  | Texas Retina Associates               | Dallas, TX US                            | Coordinator                                             |                                                                                            |
| Karen                             | Duignan         |                       |                  | Texas Retina Associates               | Dallas, TX US                            | VA Tester                                               |                                                                                            |
| Brenda                            | Sanchez         |                       |                  | Texas Retina Associates               | Dallas, TX US                            | VA Tester                                               |                                                                                            |
| Michael                           | Mackens         |                       |                  | Texas Retina Associates               | Dallas, TX US                            | Photographer                                            |                                                                                            |
| Nicholas                          | Hesse           |                       |                  | Texas Retina Associates               | Dallas, TX US                            | Photographer                                            |                                                                                            |

## Supplemental Online Content: Nonauthor Collaborators

\*Indicates required information. Only first name, last name, and suffix will appear in PubMed.

| *First Name and Middle Initial(s) | *Last Name  | *Suffix (eg, Jr, III) | Academic Degrees           | Institution                                       | Location (city, state/province, country) | Role or Contribution, eg, chair, principal investigator | Group (if more than 1 Group listed in the byline) and/or Subgroup (eg, Steering Committee) |
|-----------------------------------|-------------|-----------------------|----------------------------|---------------------------------------------------|------------------------------------------|---------------------------------------------------------|--------------------------------------------------------------------------------------------|
| Tina M                            | Stanley     |                       |                            | Texas Retina Associates                           | Dallas, TX US                            | Photographer                                            |                                                                                            |
| Thomas W.                         | Stone       |                       | MD                         | Retina and Vitreous Associates of Kentucky        | Lexington, KY US                         | Investigator                                            |                                                                                            |
| John W.                           | Kitchens    |                       | MD                         | Retina and Vitreous Associates of Kentucky        | Lexington, KY US                         | Investigator                                            |                                                                                            |
| Diana M.                          | Holcomb     |                       | COA                        | Retina and Vitreous Associates of Kentucky        | Lexington, KY US                         | Coordinator                                             |                                                                                            |
| Brenda                            | VanHoose    |                       |                            | Retina and Vitreous Associates of Kentucky        | Lexington, KY US                         | VA Tester                                               |                                                                                            |
| Jeanne                            | Van Arsdall |                       |                            | Retina and Vitreous Associates of Kentucky        | Lexington, KY US                         | VA Tester                                               |                                                                                            |
| Michelle                          | Buck        |                       | B.A.,<br>C.O.T.            | Retina and Vitreous Associates of Kentucky        | Lexington, KY US                         | Photographer                                            |                                                                                            |
| Edward A                          | Slade       |                       | B.A.,<br>C.R.A.,<br>C.O.A. | Retina and Vitreous Associates of Kentucky        | Lexington, KY US                         | Photographer                                            |                                                                                            |
| Bryan                             | Noel        |                       |                            | Retina and Vitreous Associates of Kentucky        | Lexington, KY US                         | Photographer                                            |                                                                                            |
| Clement K.                        | Chan        |                       | MD, FACS                   | Southern California Desert Retina Consultants, MC | Palm Desert, CA US                       | Investigator                                            |                                                                                            |
| Maziar                            | Lalezary    |                       | MD                         | Southern California Desert Retina Consultants, MC | Palm Desert, CA US                       | Investigator                                            |                                                                                            |
| Tiana                             | Gonzales    |                       |                            | Southern California Desert Retina Consultants, MC | Palm Desert, CA US                       | Coordinator                                             |                                                                                            |
| Kimberly S.                       | Walther     |                       |                            | Southern California Desert Retina Consultants, MC | Palm Desert, CA US                       | Coordinator                                             |                                                                                            |
| Lenise E.                         | Myers       |                       | COA                        | Southern California Desert Retina Consultants, MC | Palm Desert, CA US                       | VA Tester                                               |                                                                                            |
| Kenneth M.                        | Huff        |                       | COA                        | Southern California Desert Retina Consultants, MC | Palm Desert, CA US                       | Photographer                                            |                                                                                            |
| Karim N.                          | Jamal       |                       | MD                         | Retinal Consultants of Arizona                    | Phoenix, AZ US                           | Investigator                                            |                                                                                            |

Supplemental Online Content: Nonauthor Collaborators

\*Indicates required information. Only first name, last name, and suffix will appear in PubMed.

| *First Name and Middle Initial(s) | *Last Name    | *Suffix (eg, Jr, III) | Academic Degrees | Institution                                               | Location (city, state/province, country) | Role or Contribution, eg, chair, principal investigator | Group (if more than 1 Group listed in the byline) and/or Subgroup (eg, Steering Committee) |
|-----------------------------------|---------------|-----------------------|------------------|-----------------------------------------------------------|------------------------------------------|---------------------------------------------------------|--------------------------------------------------------------------------------------------|
| David T.                          | Goldenberg    |                       | MD               | Retinal Consultants of Arizona                            | Phoenix, AZ US                           | Investigator                                            |                                                                                            |
| Sachin                            | Mehta         |                       | MD               | Retinal Consultants of Arizona                            | Phoenix, AZ US                           | Investigator                                            |                                                                                            |
| Scheleen R.                       | Dickens       |                       |                  | Retinal Consultants of Arizona                            | Phoenix, AZ US                           | Coordinator                                             |                                                                                            |
| Jessica L.                        | Miner         |                       | RN               | Retinal Consultants of Arizona                            | Phoenix, AZ US                           | Coordinator                                             |                                                                                            |
| Heather                           | Dunlap        |                       |                  | Retinal Consultants of Arizona                            | Phoenix, AZ US                           | VA Tester                                               |                                                                                            |
| Lydia                             | Saiz          |                       |                  | Retinal Consultants of Arizona                            | Phoenix, AZ US                           | VA Tester                                               |                                                                                            |
| Rohana                            | Yager         |                       |                  | Retinal Consultants of Arizona                            | Phoenix, AZ US                           | Photographer                                            |                                                                                            |
| John J.                           | Bucci         |                       |                  | Retinal Consultants of Arizona                            | Phoenix, AZ US                           | Photographer                                            |                                                                                            |
| Dayna                             | Bartoli       |                       |                  | Retinal Consultants of Arizona                            | Phoenix, AZ US                           | Photographer                                            |                                                                                            |
| Kevin J.                          | Blinder       |                       | MD               | The Retina Institute                                      | St. Louis, MO US                         | Investigator                                            |                                                                                            |
| Ginny S.                          | Nobel         |                       | COT              | The Retina Institute                                      | St. Louis, MO US                         | Coordinator                                             |                                                                                            |
| Rhonda F.                         | Weeks         |                       | CCRC             | The Retina Institute                                      | St. Louis, MO US                         | Coordinator                                             |                                                                                            |
| Kelly E.                          | Pepple        |                       |                  | The Retina Institute                                      | St. Louis, MO US                         | VA Tester                                               |                                                                                            |
| Lynda K.                          | Boyd          |                       | C.O.T.           | The Retina Institute                                      | St. Louis, MO US                         | VA Tester                                               |                                                                                            |
| Maria A.                          | Stuart        |                       | COA              | The Retina Institute                                      | St. Louis, MO US                         | VA Tester                                               |                                                                                            |
| Brook G.                          | Pulliam       |                       | COA              | The Retina Institute                                      | St. Louis, MO US                         | VA Tester                                               |                                                                                            |
| Diana                             | Reardon       |                       | RNA              | The Retina Institute                                      | St. Louis, MO US                         | VA Tester                                               |                                                                                            |
| Dana L                            | Gabel         |                       |                  | The Retina Institute                                      | St. Louis, MO US                         | Photographer                                            |                                                                                            |
| Steve A                           | Schremp       |                       |                  | The Retina Institute                                      | St. Louis, MO US                         | Photographer                                            |                                                                                            |
| Timothy L                         | Wright        |                       |                  | The Retina Institute                                      | St. Louis, MO US                         | Photographer                                            |                                                                                            |
| Jarrold                           | Wehmeier      |                       |                  | The Retina Institute                                      | St. Louis, MO US                         | Photographer                                            |                                                                                            |
| Arup                              | Das           |                       | MD, PhD          | University of New Mexico Health Sciences Center           | Albuquerque, NM US                       | Investigator                                            |                                                                                            |
| Jiong                             | Yan           |                       | MD               | Emory Eye Center                                          | ATLANTA, GA US                           | Investigator                                            |                                                                                            |
| Seema                             | Garg          |                       | MD, PhD          | KITTNER EYE CENTER                                        | CHAPEL HILL, NC US                       | Investigator                                            |                                                                                            |
| Jan Andrew                        | Kylstra       |                       | MD               | Storm Eye Institute, Medical University of South Carolina | Charleston, SC US                        | Investigator                                            |                                                                                            |
| Mathew W.                         | MacCumber     |                       | MD, PhD          | Rush University Medical Center                            | Chicago, IL US                           | Investigator                                            |                                                                                            |
| Danielle R.                       | Carns         |                       | BS               | Rush University Medical Center                            | Chicago, IL US                           | Coordinator                                             |                                                                                            |
| Denise L.                         | Voskuil-Marre |                       |                  | Rush University Medical Center                            | Chicago, IL US                           | Coordinator                                             |                                                                                            |
| Eileen E.                         | Tonner        |                       | BS               | Rush University Medical Center                            | Chicago, IL US                           | Coordinator                                             |                                                                                            |



## Supplemental Online Content: Nonauthor Collaborators

\*Indicates required information. Only first name, last name, and suffix will appear in PubMed.

| *First Name and Middle Initial(s) | *Last Name | *Suffix (eg, Jr, III) | Academic Degrees   | Institution                                                             | Location (city, state/province, country) | Role or Contribution, eg, chair, principal investigator | Group (if more than 1 Group listed in the byline) and/or Subgroup (eg, Steering Committee) |
|-----------------------------------|------------|-----------------------|--------------------|-------------------------------------------------------------------------|------------------------------------------|---------------------------------------------------------|--------------------------------------------------------------------------------------------|
| Evan R.                           | Rosenberg  |                       | COT                | Rush University Medical Center                                          | Chicago, IL US                           | VA Tester                                               |                                                                                            |
| Kisung                            | Woo        |                       |                    | Rush University Medical Center                                          | Chicago, IL US                           | Photographer                                            |                                                                                            |
| Len                               | Richine    |                       |                    | Rush University Medical Center                                          | Chicago, IL US                           | Photographer                                            |                                                                                            |
| Daniel M.                         | Miller     |                       | M.D., Ph.D.        | Cincinnati Eye Institute                                                | Cincinnati, OH US                        | Investigator                                            |                                                                                            |
| Suber S.                          | Huang      |                       | M.D.               | University Hospitals Cleveland Medical Center                           | CLEVELAND, OH US                         | Investigator                                            |                                                                                            |
| Paul Andrew                       | Edwards    |                       | MD                 | Henry Ford Health System, Dept of Ophthalmology and Eye Care Services   | DETROIT, MI US                           | Investigator                                            |                                                                                            |
| Stephen R.                        | Kaufman    |                       | MD                 | Vitreoretinal Consultants, Inc.                                         | Hermitage, PA US                         | Investigator                                            |                                                                                            |
| Garvin H.                         | Davis      |                       | MD                 | Robert Cizik Eye Clinic                                                 | Houston, TX US                           | Investigator                                            |                                                                                            |
| John S.                           | Pollack    |                       | M.D.               | Illinois Retina Associates                                              | Joliet, IL US                            | Investigator                                            |                                                                                            |
| Howard L.                         | Cummings   |                       | MD, FACS           | Southeastern Retina Associates, PC                                      | Kingsport, TN US                         | Investigator                                            |                                                                                            |
| Allen B.                          | Thach      |                       | MD                 | Retina Consultants of Nevada                                            | Las Vegas, NV US                         | Investigator                                            |                                                                                            |
| Daniel A.                         | Chruscicki |                       | MD                 | Eye Surgical Associates                                                 | Lincoln, NE US                           | Investigator                                            |                                                                                            |
| Steven M.                         | Bloom      |                       | M.D.               | Kentuckiana Institute for Eye Research at Bennett and Bloom Eye Centers | Louisville, KY US                        | Investigator                                            |                                                                                            |
| Craig A.                          | Lemley     |                       | MD                 | Medical Eye Center                                                      | Medford, OR US                           | Investigator                                            |                                                                                            |
| Howard S.                         | Lazarus    |                       | MD                 | John-Kenyon American Eye Institute                                      | New Albany, IN US                        | Investigator                                            |                                                                                            |
| Ron A.                            | Adelman    |                       | MD, MPH, MBA, FACS | Yale University Eye Center                                              | New Haven, CT US                         | Investigator                                            |                                                                                            |
| Ronald C                          | Gentile    |                       | MD                 | The New York Eye and Ear Infirmary/Faculty Eye Practice                 | New York, NY US                          | Investigator                                            |                                                                                            |
| Alex                              | Yang       |                       |                    | The New York Eye and Ear Infirmary/Faculty Eye Practice                 | New York, NY US                          | Coordinator                                             |                                                                                            |

## Supplemental Online Content: Nonauthor Collaborators

\*Indicates required information. Only first name, last name, and suffix will appear in PubMed.

| *First Name and Middle Initial(s) | *Last Name | *Suffix (eg, Jr, III) | Academic Degrees | Institution                                                   | Location (city, state/province, country) | Role or Contribution, eg, chair, principal investigator | Group (if more than 1 Group listed in the byline) and/or Subgroup (eg, Steering Committee) |
|-----------------------------------|------------|-----------------------|------------------|---------------------------------------------------------------|------------------------------------------|---------------------------------------------------------|--------------------------------------------------------------------------------------------|
| Dominique                         | Jampol     |                       |                  | The New York Eye and Ear Infirmary/Faculty Eye Practice       | New York, NY US                          | Photographer                                            |                                                                                            |
| Robert                            | Masini     |                       |                  | The New York Eye and Ear Infirmary/Faculty Eye Practice       | New York, NY US                          | Photographer                                            |                                                                                            |
| Patricia J.                       | Pahk       |                       | M.D.             | Mount Sinai School of Medicine, Dept. of Ophthalmology        | New York, NY US                          | Investigator                                            |                                                                                            |
| Daniel F.                         | Rosberger  |                       | MD, PhD, MPH     | MaculaCare                                                    | New York, NY US                          | Investigator                                            |                                                                                            |
| Neelakshi                         | Bhagat     |                       | MD, MPH, FACS    | The Institute of Ophthalmology and Visual Science (IOVS)      | Newark, NJ US                            | Investigator                                            |                                                                                            |
| Ronald M.                         | Kingsley   |                       | MD               | Dean A. McGee Eye Institute                                   | Oklahoma City, OK US                     | Investigator                                            |                                                                                            |
| Baruch D.                         | Kuppermann |                       | MD, PhD          | University of California, Irvine                              | Orange, CA US                            | Investigator                                            |                                                                                            |
| John T.                           | Lehr       |                       | M.D.             | Magruder Eye Institute                                        | Orlando, FL US                           | Investigator                                            |                                                                                            |
| Ramin                             | Schadlu    |                       | MD               | Arizona Retina and Vitreous Consultants                       | PHOENIX, AZ US                           | Investigator                                            |                                                                                            |
| Prema                             | Abraham    |                       | MD               | Black Hills Regional Eye Institute                            | Rapid City, SD US                        | Investigator                                            |                                                                                            |
| John Stewart                      | O'Keefe    |                       | MD               | Retina Institute of Virginia                                  | Richmond, VA US                          | Investigator                                            |                                                                                            |
| Mary Elizabeth                    | Hartnett   |                       | M.D.             | University of Utah                                            | Salt Lake City, UT US                    | Investigator                                            |                                                                                            |
| Robert C.                         | Kwun       |                       | MD               | Retina Associates of Utah, P.C.                               | Salt Lake City, UT US                    | Investigator                                            |                                                                                            |
| Paul L.                           | Kaufman    |                       | MD               | Thomas Eye Group                                              | SANDY SPRINGS, GA US                     | Investigator                                            |                                                                                            |
| Michael Brandon                   | Parrott    |                       | MD, PhD          | Center for Sight                                              | Sarasota, FL US                          | Investigator                                            |                                                                                            |
| Keye L.                           | Wong       |                       | MD               | Retina Associates of Sarasota                                 | Venice, FL US                            | Investigator                                            |                                                                                            |
| Jeevan R.                         | Mathura    | Jr.                   |                  | The George Washington University, Department of Ophthalmology | Washington, DC US                        | Investigator                                            |                                                                                            |
| Roy W.                            | Beck       |                       | MD               | JAEB Center for Health Research                               | Tampa, FL US                             |                                                         |                                                                                            |

Supplemental Online Content: Nonauthor Collaborators

\*Indicates required information. Only first name, last name, and suffix will appear in PubMed.

| *First Name and Middle Initial(s) | *Last Name  | *Suffix (eg, Jr, III) | Academic Degrees | Institution                     | Location (city, state/province, country) | Role or Contribution, eg, chair, principal investigator | Group (if more than 1 Group listed in the byline) and/or Subgroup (eg, Steering Committee) |
|-----------------------------------|-------------|-----------------------|------------------|---------------------------------|------------------------------------------|---------------------------------------------------------|--------------------------------------------------------------------------------------------|
| Alyssa                            | Baptista    |                       | BS               | JAEB Center for Health Research | Tampa, FL US                             |                                                         |                                                                                            |
| Wesley T.                         | Beaulieu    |                       | PhD              | JAEB Center for Health Research | Tampa, FL US                             |                                                         |                                                                                            |
| Claire T.                         | Boyle       |                       | MS               | JAEB Center for Health Research | Tampa, FL US                             |                                                         |                                                                                            |
| Sharon R.                         | Constantine |                       | BS               | JAEB Center for Health Research | Tampa, FL US                             |                                                         |                                                                                            |
| Isabella                          | Correia     |                       |                  | JAEB Center for Health Research | Tampa, FL US                             |                                                         |                                                                                            |
| Brian B.                          | Dale        |                       |                  | JAEB Center for Health Research | Tampa, FL US                             |                                                         |                                                                                            |
| Simone S.                         | Dupre       |                       | BS               | JAEB Center for Health Research | Tampa, FL US                             |                                                         |                                                                                            |
| Sandra                            | Galusic     |                       | MSPH             | JAEB Center for Health Research | Tampa, FL US                             |                                                         |                                                                                            |
| Meagan                            | Huggins     |                       | BA               | JAEB Center for Health Research | Tampa, FL US                             |                                                         |                                                                                            |
| Paula A.                          | Johnson     |                       | MPH              | JAEB Center for Health Research | Tampa, FL US                             |                                                         |                                                                                            |
| Brittany                          | Kelly       |                       | MS               | JAEB Center for Health Research | Tampa, FL US                             |                                                         |                                                                                            |
| Danni                             | Liu         |                       | MSPH             | JAEB Center for Health Research | Tampa, FL US                             |                                                         |                                                                                            |
| Brenda                            | Loggins     |                       | BS               | JAEB Center for Health Research | Tampa, FL US                             |                                                         |                                                                                            |
| Carin M.                          | Preston     |                       | MPH              | JAEB Center for Health Research | Tampa, FL US                             |                                                         |                                                                                            |
| Katie                             | Stutz       |                       | BS               | JAEB Center for Health Research | Tampa, FL US                             |                                                         |                                                                                            |
| Carl W.                           | Baker       |                       | MD               |                                 |                                          |                                                         |                                                                                            |

Supplemental Online Content: Nonauthor Collaborators

\*Indicates required information. Only first name, last name, and suffix will appear in PubMed.

| *First Name and Middle Initial(s) | *Last Name | *Suffix (eg, Jr, III) | Academic Degrees | Institution                                                          | Location (city, state/province, country) | Role or Contribution, eg, chair, principal investigator | Group (if more than 1 Group listed in the byline) and/or Subgroup (eg, Steering Committee) |
|-----------------------------------|------------|-----------------------|------------------|----------------------------------------------------------------------|------------------------------------------|---------------------------------------------------------|--------------------------------------------------------------------------------------------|
| Chirag                            | Jhaveri    |                       | MD               |                                                                      |                                          |                                                         |                                                                                            |
| Mathew                            | MacCumber  |                       | MD, PhD          |                                                                      |                                          |                                                         |                                                                                            |
| Judy                              | Kim        |                       | MD               |                                                                      |                                          |                                                         |                                                                                            |
| John A.                           | Wells      | III                   | MD, FACS         |                                                                      |                                          |                                                         |                                                                                            |
| Sangeeta                          | Bhargava   |                       |                  |                                                                      |                                          |                                                         |                                                                                            |
| Frederick L.                      | Ferris     | III                   | MD               |                                                                      |                                          |                                                         |                                                                                            |
| Glenn J.                          | Jaffe      |                       | MD               |                                                                      |                                          |                                                         |                                                                                            |
| Chirag D.                         | Jhaveri    |                       | MD               |                                                                      |                                          |                                                         |                                                                                            |
| Judy E.                           | Kim        |                       | MD               |                                                                      |                                          |                                                         |                                                                                            |
| Brandon                           | Lujan      |                       | MD               |                                                                      |                                          |                                                         |                                                                                            |
| Mathew                            | MacCumber  |                       | MD, PhD          |                                                                      |                                          |                                                         |                                                                                            |
| Neil M. B                         | Bressler   |                       | MD               |                                                                      |                                          |                                                         |                                                                                            |
| Matthew D.                        | Davis      |                       | MD               |                                                                      |                                          |                                                         |                                                                                            |
| Michael J.                        | Elman      |                       | MD               |                                                                      |                                          |                                                         |                                                                                            |
| Jeffrey G.                        | Gross      |                       | MD               |                                                                      |                                          |                                                         |                                                                                            |
| Diana M.                          | Holcomb    |                       | COA              |                                                                      |                                          |                                                         |                                                                                            |
| Andreas K.                        | Lauer      |                       | MD               |                                                                      |                                          |                                                         |                                                                                            |
| Ashley A.                         | McClain    |                       | BS, CRS          |                                                                      |                                          |                                                         |                                                                                            |
| Brandi J.                         | Perez      |                       |                  |                                                                      |                                          |                                                         |                                                                                            |
| Gary                              | Abrams     |                       | MD               |                                                                      |                                          |                                                         |                                                                                            |
| Deborah R.                        | Barnbaum   |                       | PhD              |                                                                      |                                          |                                                         |                                                                                            |
| Harry                             | Flynn      |                       | MD               |                                                                      |                                          |                                                         |                                                                                            |
| Kyle D.                           | Rudser     |                       | PhD              |                                                                      |                                          |                                                         |                                                                                            |
| Paul                              | Sternberg  | Jr.                   | MD               |                                                                      |                                          |                                                         |                                                                                            |
| Ruth S.                           | Weinstock  |                       | MD, PhD          |                                                                      |                                          |                                                         |                                                                                            |
| Stephen                           | Wisniewski |                       | PhD              |                                                                      |                                          |                                                         |                                                                                            |
| Charles P.                        | Wilkinson  |                       | MD               |                                                                      |                                          |                                                         |                                                                                            |
| Barbara                           | Blodi      |                       |                  | Fundus Photograph Reading Center,<br>University of Wisconsin-Madison | Madison, WI US                           |                                                         |                                                                                            |

Supplemental Online Content: Nonauthor Collaborators

\*Indicates required information. Only first name, last name, and suffix will appear in PubMed.

| *First Name and Middle Initial(s) | *Last Name | *Suffix (eg, Jr, III) | Academic Degrees | Institution                                                       | Location (city, state/province, country) | Role or Contribution, eg, chair, principal investigator | Group (if more than 1 Group listed in the byline) and/or Subgroup (eg, Steering Committee) |
|-----------------------------------|------------|-----------------------|------------------|-------------------------------------------------------------------|------------------------------------------|---------------------------------------------------------|--------------------------------------------------------------------------------------------|
| Matthew D.                        | Davis      |                       |                  | Fundus Photograph Reading Center, University of Wisconsin-Madison | Madison, WI US                           |                                                         |                                                                                            |
| Amitha                            | Domalpally |                       |                  | Fundus Photograph Reading Center, University of Wisconsin-Madison | Madison, WI US                           |                                                         |                                                                                            |
| James L                           | Reimers    |                       |                  | Fundus Photograph Reading Center, University of Wisconsin-Madison | Madison, WI US                           |                                                         |                                                                                            |
| Pamela                            | Vargo      |                       |                  | Fundus Photograph Reading Center, University of Wisconsin-Madison | Madison, WI US                           |                                                         |                                                                                            |
| Dawn                              | Myers      |                       |                  | Fundus Photograph Reading Center, University of Wisconsin-Madison | Madison, WI US                           |                                                         |                                                                                            |
| Daniel                            | Lawrence   |                       |                  | Fundus Photograph Reading Center, University of Wisconsin-Madison | Madison, WI US                           |                                                         |                                                                                            |
| James                             | Allan      |                       |                  | Fundus Photograph Reading Center, University of Wisconsin-Madison | Madison, WI US                           |                                                         |                                                                                            |
| Ashley                            | Harris     |                       |                  | Fundus Photograph Reading Center, University of Wisconsin-Madison | Madison, WI US                           |                                                         |                                                                                            |
| Ellie                             | Corkery    |                       |                  | Fundus Photograph Reading Center, University of Wisconsin-Madison | Madison, WI US                           |                                                         |                                                                                            |
| Kristi L                          | Dohm       |                       |                  | Fundus Photograph Reading Center, University of Wisconsin-Madison | Madison, WI US                           |                                                         |                                                                                            |

Supplemental Online Content: Nonauthor Collaborators

\*Indicates required information. Only first name, last name, and suffix will appear in PubMed.

| *First Name and Middle Initial(s) | *Last Name | *Suffix (eg, Jr, III) | Academic Degrees | Institution                                                       | Location (city, state/province, country) | Role or Contribution, eg, chair, principal investigator | Group (if more than 1 Group listed in the byline) and/or Subgroup (eg, Steering Committee) |
|-----------------------------------|------------|-----------------------|------------------|-------------------------------------------------------------------|------------------------------------------|---------------------------------------------------------|--------------------------------------------------------------------------------------------|
| Kristine                          | Lang       |                       |                  | Fundus Photograph Reading Center, University of Wisconsin-Madison | Madison, WI US                           |                                                         |                                                                                            |
| Ruth                              | Shaw       |                       |                  | Fundus Photograph Reading Center, University of Wisconsin-Madison | Madison, WI US                           |                                                         |                                                                                            |
| Sheila                            | Watson     |                       |                  | Fundus Photograph Reading Center, University of Wisconsin-Madison | Madison, WI US                           |                                                         |                                                                                            |
| Wendy K                           | Benz       |                       |                  | Fundus Photograph Reading Center, University of Wisconsin-Madison | Madison, WI US                           |                                                         |                                                                                            |
| Michael                           | Wall       |                       |                  | University of Iowa Visual Field Reading Center                    | Coralville, IA US                        |                                                         |                                                                                            |
| Chris                             | Johnson    |                       |                  | University of Iowa Visual Field Reading Center                    | Coralville, IA US                        |                                                         |                                                                                            |
| Todd                              | Shinkunas  |                       |                  | University of Iowa Visual Field Reading Center                    | Coralville, IA US                        |                                                         |                                                                                            |
| Trina                             | Eden       |                       |                  | University of Iowa Visual Field Reading Center                    | Coralville, IA US                        |                                                         |                                                                                            |
| Kimberly                          | Woodward   |                       |                  | University of Iowa Visual Field Reading Center                    | Coralville, IA US                        |                                                         |                                                                                            |
| Adiel                             | Mora       |                       |                  | Duke Reading Center                                               | Durham, NC US                            |                                                         |                                                                                            |
| Ellen                             | Young      |                       |                  | Duke Reading Center                                               | Durham, NC US                            |                                                         |                                                                                            |
| Chris                             | Harrington |                       |                  | Duke Reading Center                                               | Durham, NC US                            |                                                         |                                                                                            |
| Glenn J.                          | Jaffe      |                       |                  | Duke Reading Center                                               | Durham, NC US                            |                                                         |                                                                                            |
| Trina                             | Winter     |                       |                  | Duke Reading Center                                               | Durham, NC US                            |                                                         |                                                                                            |
| Kelly                             | Inman      |                       |                  | Duke Reading Center                                               | Durham, NC US                            |                                                         |                                                                                            |
| Cindy J.                          | Heydary    |                       |                  | Duke Reading Center                                               | Durham, NC US                            |                                                         |                                                                                            |
| Justin                            | Myers      |                       |                  | Duke Reading Center                                               | Durham, NC US                            |                                                         |                                                                                            |
| Kelly                             | Shields    |                       |                  | Duke Reading Center                                               | Durham, NC US                            |                                                         |                                                                                            |

Supplemental Online Content: Nonauthor Collaborators

\*Indicates required information. Only first name, last name, and suffix will appear in PubMed.

| <b>*First Name and Middle Initial(s)</b> | <b>*Last Name</b> | <b>*Suffix (eg, Jr, III)</b> | Academic Degrees | Institution         | Location (city, state/province, country) | Role or Contribution, eg, chair, principal investigator | Group (if more than 1 Group listed in the byline) and/or Subgroup (eg, Steering Committee) |
|------------------------------------------|-------------------|------------------------------|------------------|---------------------|------------------------------------------|---------------------------------------------------------|--------------------------------------------------------------------------------------------|
| Dee                                      | Busian            |                              |                  | Duke Reading Center | Durham, NC US                            |                                                         |                                                                                            |
| Garrett                                  | Thompson          |                              |                  | Duke Reading Center | Durham, NC US                            |                                                         |                                                                                            |
| Keifer                                   | McGugan           |                              |                  | Duke Reading Center | Durham, NC US                            |                                                         |                                                                                            |
